# Supplementary material for: Impact of solvent interactions on1H and13C chemical shifts investigated using DFT and a reference dataset recorded in CDCl3and CCl4
Source: Royal Society of Chemistry journal article supplement (doi:10.1039/d2cp03205h), 2022-01-01
Supplement: d2cp03205h1.pdf [file d2cp03205h1.pdf]

# Supplementary Material

***Impact of solvent interactions on  $^1\text{H}$  and  $^{13}\text{C}$  chemical shifts investigated using DFT and a reference dataset recorded in  $\text{CDCl}_3$  and  $\text{CCl}_4$***

Thomas Stadelmann, Chantal Balmer, Sereina Riniker\* and Marc-Olivier Ebert\*

---

Department of Chemistry and Applied Biosciences, ETH Zurich, Vladimir-Prelog-Weg 1-5, 8093 Zurich, Switzerland

\* [sriniker@ethz.ch](mailto:sriniker@ethz.ch); [marc-olivier.ebert@org.chem.ethz.ch](mailto:marc-olivier.ebert@org.chem.ethz.ch)

## Collection of Chemical Shifts from the Literature

Literature data from different sources (maximum ten per compound) were collected for comparison with our measured chemical shifts in  $\text{CDCl}_3$  (Figure 1 in the main text). In the literature search, only data measured in  $\text{CDCl}_3$  and published in the period between 1980 and 2022 were considered (mostly found via Reaxys). The shifts from the following references were used: **1**<sup>1-6</sup> **2**<sup>2,3,6-8</sup> **3**<sup>3,6-14</sup> **4**<sup>15-20</sup> **5**<sup>3,6,7,21,22</sup> **6**<sup>23</sup> **7**<sup>24-27</sup> **8**<sup>6,28-31</sup> **9**<sup>32-41</sup> **10**<sup>42,43</sup> **11**<sup>44-47</sup> **12**<sup>6,48-50</sup> **13**<sup>1,6,51-53</sup> **14**<sup>54-58</sup> **15**<sup>6,59-68</sup> **16**<sup>69-80</sup> **17**<sup>6,81-89</sup> **18**<sup>90-99</sup> **19**<sup>100-109</sup> **20**<sup>12,110-118</sup> **21**<sup>50,119</sup> **22**<sup>120-122</sup> **23**<sup>6,123-127</sup> **24**<sup>128-138</sup> **25**<sup>136,139,140</sup> **26**<sup>141-151</sup> **27**<sup>152-161</sup> **28**<sup>162-170</sup> **29**<sup>171-179</sup> **30**<sup>180-190</sup> **31**<sup>191-200</sup> **32**<sup>201-207</sup> **33**<sup>208-217</sup> **34**<sup>218-227</sup> **35**<sup>6,228-237</sup>

## Effect of Solute-Solvent Interactions in Experiment: Compounds **26** and **34**

The sites of specific solvent-solute interactions were identified by comparison of the chemical shifts measured in  $\text{CDCl}_3$  and  $\text{CCl}_4$ . For **26**, the  $^{13}\text{C}$  chemical shift of the carbonyl carbon, as well as the shift of the conjugated  $\beta$ -carbon (Figure S1, carbons 1 and 3), move towards higher field when changing the solvent from chloroform-d to tetrachloromethane, whereas the other carbons that are not affected by hydrogen bonding with the solvent, have nearly identical chemical shifts. The shifts of protons close to functional groups involved in hydrogen bonds with chloroform are also affected by the change in solvent (Figure S2, protons at carbon 2 and 6 of **26**,  $\alpha$  to carbonyl group). A similar behavior is observed for the  $^{13}\text{C}$  shifts of **34** (Figure S3).

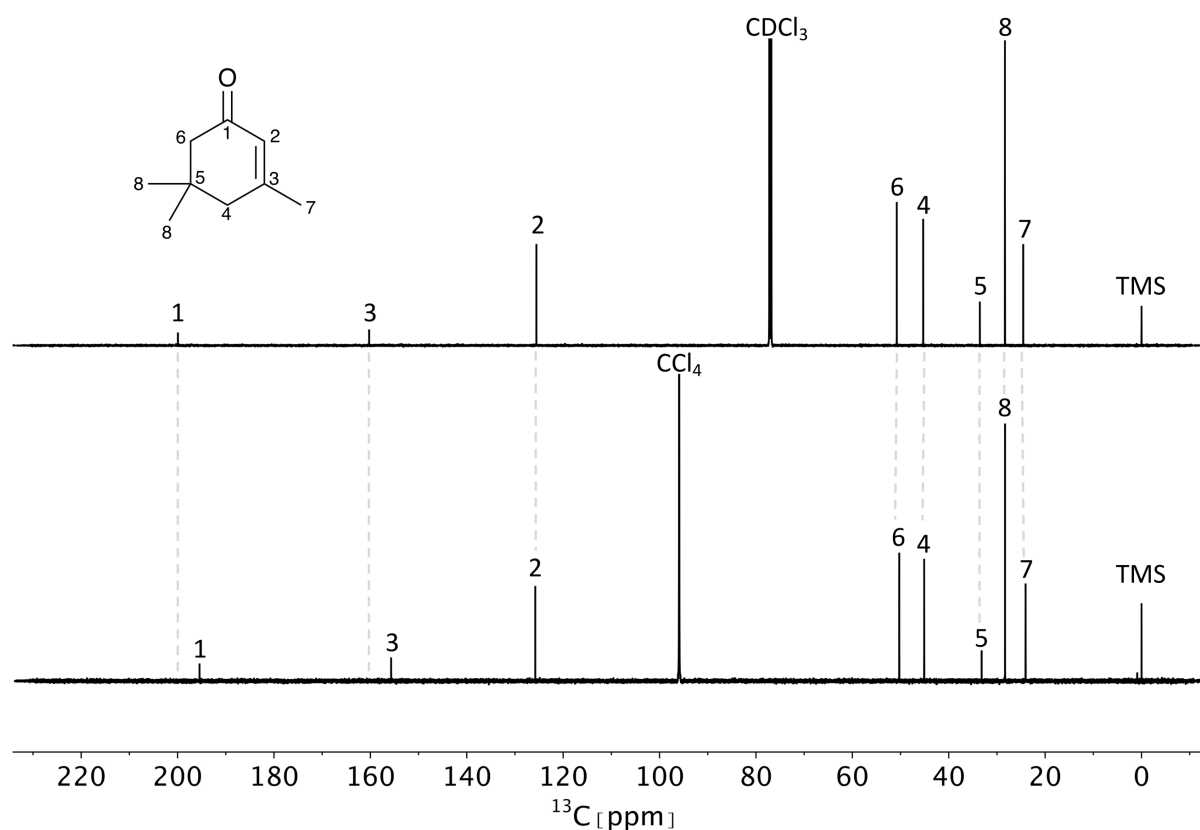

Figure S1:  $^{13}\text{C}$  spectra of **26** in chloroform-d (top) and tetrachloromethane (bottom) referenced to internal TMS. Dashed grey lines help to visualize chemical shift differences between the two solvents.

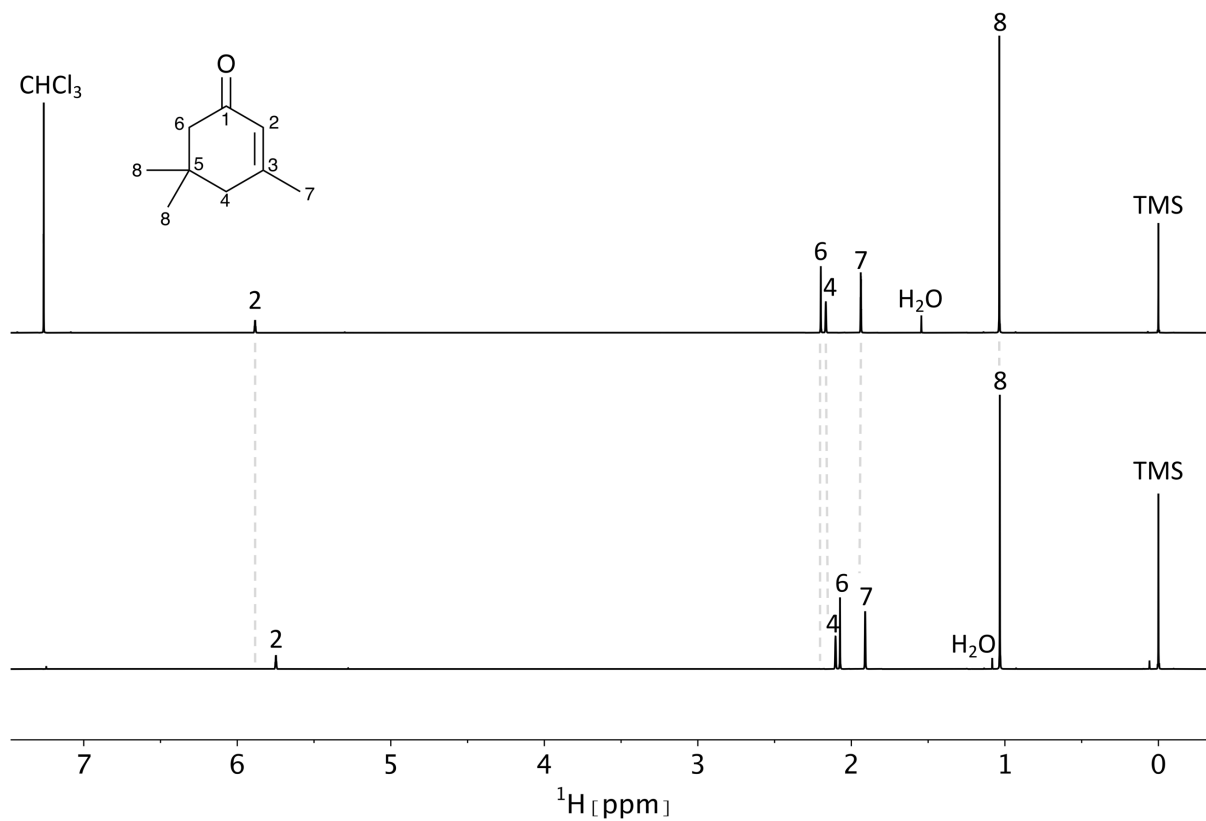

Figure S2:  $^1\text{H}$  spectra of **26** in chloroform- $d$  (top) and tetrachloromethane (bottom) referenced to internal TMS. Dashed grey lines help to visualize the chemical shift differences between the two solvents.

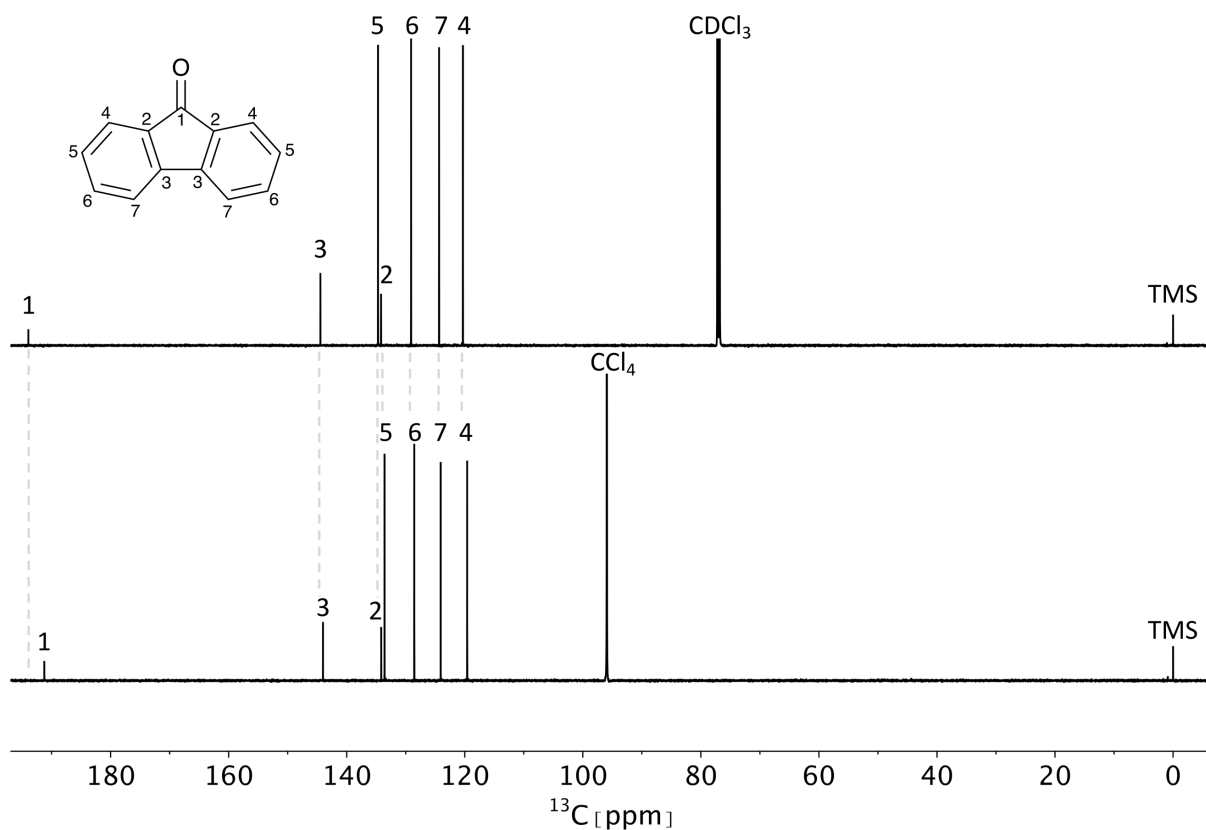

Figure S3:  $^{13}\text{C}$  spectra of **34** in chloroform- $d$  (top) and tetrachloromethane (bottom) referenced to internal TMS. Dashed grey lines help to visualize the chemical shift differences between the two solvents. The largest change is observed for carbonyl carbon 1.

## Additional Figures and Tables:

### Comparison of experimental data

Table S1: Root-mean-square deviation (RMSD), mean absolute deviation (MAD), maximum absolute deviation (Max. AD) when comparing the  $^1\text{H}$  and  $^{13}\text{C}$  chemical shifts measured under standardized conditions to values collected from multiple literature sources in  $\text{CDCl}_3$ . (a) methyl protons of **11**, (b) carbons of the pyrimidine ring next to amine of **20**.

|               | $^1\text{H}$      | $^{13}\text{C}$   |
|---------------|-------------------|-------------------|
| RMSD [ppm]    | 0.05              | 0.26              |
| MAD [ppm]     | 0.09              | 0.15              |
| Max. AD [ppm] | 0.40 <sup>a</sup> | 3.00 <sup>b</sup> |

Table S2: RMSD, MAD and max. AD when comparing the  $^1\text{H}$  and  $^{13}\text{C}$  chemical shifts measured in  $\text{CCl}_4$  and  $\text{CDCl}_3$ .

|               | $^1\text{H}$ | $^{13}\text{C}$ |
|---------------|--------------|-----------------|
| RMSD [ppm]    | 0.08         | 1.40            |
| MAD [ppm]     | 0.07         | 0.85            |
| Max. AD [ppm] | 0.20         | 5.90            |

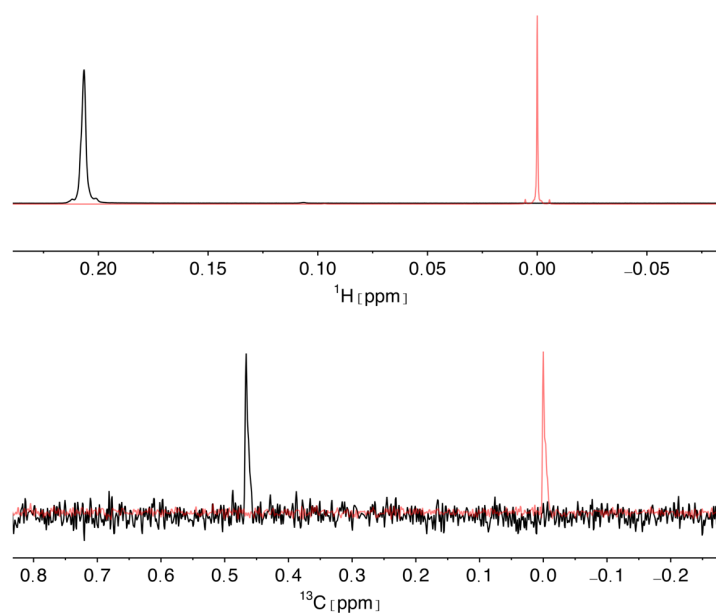

Figure S4: Overlay of  $^1\text{H}$  (top) and  $^{13}\text{C}$  (bottom) spectra of TMS in  $\text{CDCl}_3$  (red) and  $\text{CCl}_4$  (black) recorded with the same FIELD value. The TMS signal in the  $\text{CDCl}_3$  spectra was referenced to 0 ppm. The same SR value was set in the  $\text{CCl}_4$  spectra.

### Comparison of experimental data to vacuum calculations (PBE0 & PBEP86)

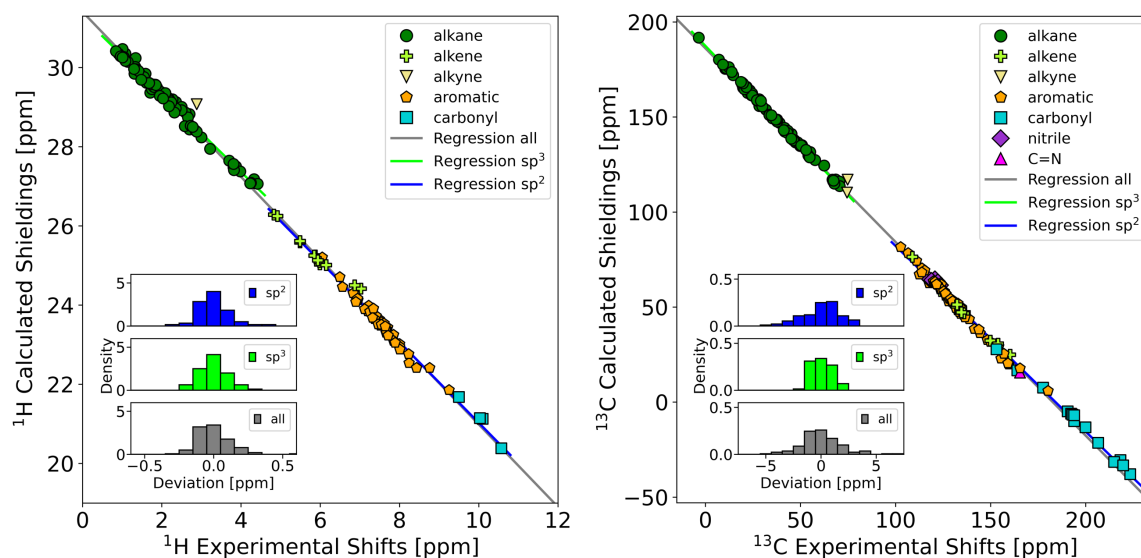

Figure S5: Regression of the calculated chemical shieldings (PBE0, in vacuum) versus the experimental chemical shifts measured in  $\text{CDCl}_3$ . (Left):  $^1\text{H}$ . (Right):  $^{13}\text{C}$ . The histograms show the deviations after conversion of the shieldings into chemical shifts using the parameters from the regression.

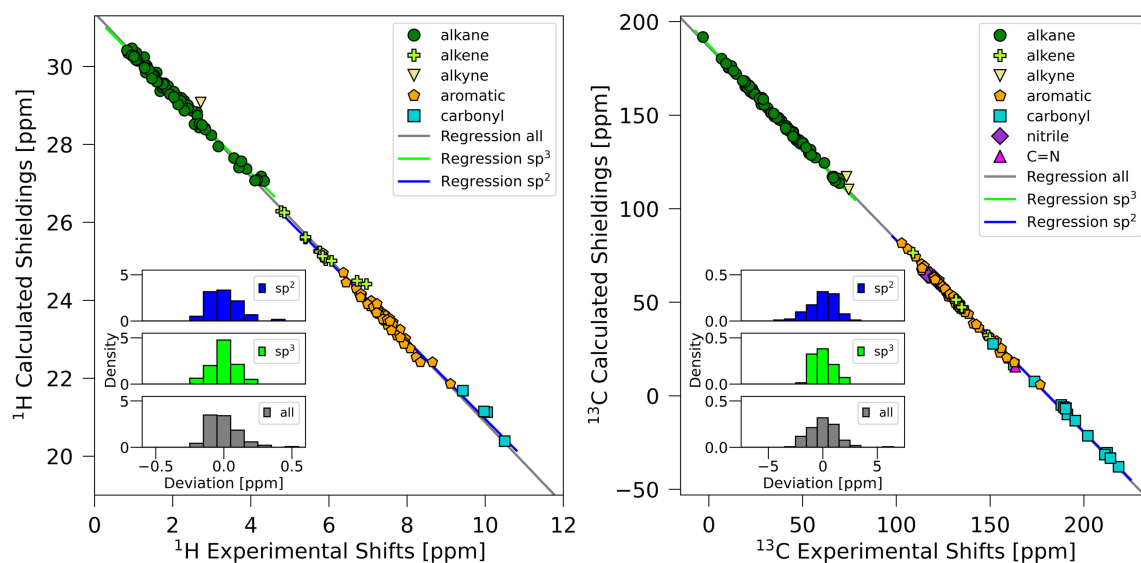

Figure S6: Regression of the calculated chemical shieldings (PBEP86, in vacuum) versus the experimental chemical shifts measured in  $\text{CCl}_4$ . (Left):  $^1\text{H}$ . (Right):  $^{13}\text{C}$ . The histograms show the deviations after conversion of the shieldings into chemical shifts using the parameters from the regression.

Table S3: MAD (ppm) of  $^1\text{H}$  and  $^{13}\text{C}$  shifts calculated in vacuum with PBE0 or PBEP86 from the experimental values in  $\text{CDCl}_3$  and  $\text{CCl}_4$ . Values are given for the complete carbon set (all), for only  $\text{sp}^2$  carbons ( $\text{sp}^2$ ) and for only  $\text{sp}^3$  carbons ( $\text{sp}^3$ ).

| DFT Method | Exp. Solvent    | $^1\text{H}$ |               |               | $^{13}\text{C}$ |               |               |
|------------|-----------------|--------------|---------------|---------------|-----------------|---------------|---------------|
|            |                 | all          | $\text{sp}^2$ | $\text{sp}^3$ | all             | $\text{sp}^2$ | $\text{sp}^3$ |
| PBE0       | $\text{CCl}_4$  | 0.09         | 0.08          | 0.07          | 1.05            | 1.08          | 0.83          |
| PBEP86     | $\text{CCl}_4$  | 0.09         | 0.08          | 0.07          | 0.98            | 0.99          | 0.73          |
| PBE0       | $\text{CDCl}_3$ | 0.09         | 0.08          | 0.08          | 1.14            | 1.32          | 0.88          |
| PBEP86     | $\text{CDCl}_3$ | 0.09         | 0.08          | 0.08          | 1.32            | 1.40          | 0.80          |

Table S4: Max. AD (ppm) of  $^1\text{H}$  and  $^{13}\text{C}$  shifts calculated in vacuum with PBE0 or PBEP86 from the experimental values in  $\text{CDCl}_3$  and  $\text{CCl}_4$ . Values are given for the complete carbon set (all), for only  $sp^2$  carbons ( $sp^2$ ) and for only  $sp^3$  carbons ( $sp^3$ ).

| DFT Method | Exp. Solvent    | $^1\text{H}$ |        |        | $^{13}\text{C}$ |        |        |
|------------|-----------------|--------------|--------|--------|-----------------|--------|--------|
|            |                 | all          | $sp^2$ | $sp^3$ | all             | $sp^2$ | $sp^3$ |
| PBE0       | $\text{CCl}_4$  | 0.32         | 0.34   | 0.23   | 5.10            | 5.04   | 2.56   |
| PBEP86     | $\text{CCl}_4$  | 0.53         | 0.38   | 0.23   | 6.10            | 3.52   | 2.27   |
| PBE0       | $\text{CDCl}_3$ | 0.43         | 0.31   | 0.26   | 5.17            | 4.65   | 2.82   |
| PBEP86     | $\text{CDCl}_3$ | 0.64         | 0.36   | 0.28   | 7.00            | 5.22   | 2.40   |

Table S5: Intercept (ppm) and slope of the linear regression of  $^1\text{H}$  and  $^{13}\text{C}$  shifts calculated in vacuum with PBE0 or PBEP86 versus the experimental values in  $\text{CDCl}_3$  and  $\text{CCl}_4$ . Values are given for the complete carbon set (all), for only  $sp^2$  carbons ( $sp^2$ ) and for only  $sp^3$  carbons ( $sp^3$ ).

| DFT Method | Exp. Solvent    | $^1\text{H}$ |        |        | $^{13}\text{C}$ |        |        |
|------------|-----------------|--------------|--------|--------|-----------------|--------|--------|
|            |                 | all          | $sp^2$ | $sp^3$ | all             | $sp^2$ | $sp^3$ |
| PBE0       | $\text{CCl}_4$  | 31.476       | 31.176 | 31.371 | 185.47          | 187.75 | 185.79 |
|            |                 | -1.062       | -1.024 | -1.006 | -1.033          | -1.048 | -1.047 |
| PBEP86     | $\text{CCl}_4$  | 31.374       | 31.067 | 31.285 | 186.51          | 187.56 | 185.41 |
|            |                 | -1.051       | -1.011 | -1.004 | -1.031          | -1.062 | -1.023 |
| PBE0       | $\text{CDCl}_3$ | 31.508       | 31.316 | 31.368 | 185.14          | 182.17 | 185.67 |
|            |                 | -1.053       | -1.030 | -0.983 | -1.021          | -1.001 | -1.032 |
| PBEP86     | $\text{CDCl}_3$ | 31.405       | 31.209 | 31.281 | 186.17          | 179.88 | 187.43 |
|            |                 | -1.042       | -1.018 | -0.980 | -1.019          | 0.977  | -1.047 |

Table S6: Cf. Table 3 in the main text: RMSD (ppm) between  $^1\text{H}$  and  $^{13}\text{C}$  shifts calculated in vacuum and experimental values in  $\text{CDCl}_3$  or  $\text{CCl}_4$ . But conversion to chemical shifts was done using Eq. (1) instead of Eq. (3) using the calculated  $^1\text{H}$  and  $^{13}\text{C}$  shieldings of TMS as reference. Values are given for the complete set (all), for  $sp^2$  carbons and attached protons ( $sp^2$ ), and for  $sp^3$  carbons and attached protons ( $sp^3$ ).

| DFT Method | Exp. Solvent    | $^1\text{H}$ |        |        | $^{13}\text{C}$ |        |        |
|------------|-----------------|--------------|--------|--------|-----------------|--------|--------|
|            |                 | all          | $sp^2$ | $sp^3$ | all             | $sp^2$ | $sp^3$ |
| PBE0       | $\text{CCl}_4$  | 0.24         | 0.35   | 0.10   | 5.79            | 6.95   | 3.73   |
| PBEP86     | $\text{CCl}_4$  | 0.19         | 0.26   | 0.10   | 6.46            | 7.63   | 4.52   |
| PBE0       | $\text{CDCl}_3$ | 0.20         | 0.27   | 0.12   | 4.89            | 5.85   | 3.31   |
| PBEP86     | $\text{CDCl}_3$ | 0.17         | 0.18   | 0.14   | 5.68            | 6.69   | 4.10   |

Table S7: MAD (ppm) of  $^1\text{H}$  and  $^{13}\text{C}$  shifts calculated in vacuum with PBE0 or PBEP86 from the experimental values in  $\text{CDCl}_3$  and  $\text{CCl}_4$ . But conversion to chemical shifts was done using Eq. (1) instead of Eq. (3). Values are given for the complete carbon set (all), for only  $sp^2$  carbons ( $sp^2$ ) and for only  $sp^3$  carbons ( $sp^3$ ).

| DFT Method | Exp. Solvent    | $^1\text{H}$ |        |        | $^{13}\text{C}$ |        |        |
|------------|-----------------|--------------|--------|--------|-----------------|--------|--------|
|            |                 | all          | $sp^2$ | $sp^3$ | all             | $sp^2$ | $sp^3$ |
| PBE0       | $\text{CCl}_4$  | 0.19         | 0.25   | 0.08   | 5.29            | 8.62   | 3.45   |
| PBEP86     | $\text{CCl}_4$  | 0.15         | 0.18   | 0.08   | 6.09            | 9.71   | 4.28   |
| PBE0       | $\text{CDCl}_3$ | 0.17         | 0.18   | 0.10   | 4.49            | 7.26   | 3.06   |
| PBEP86     | $\text{CDCl}_3$ | 0.14         | 0.12   | 0.12   | 5.30            | 8.35   | 3.89   |

Table S8: Max. AD (ppm) of  $^1\text{H}$  and  $^{13}\text{C}$  shifts calculated in vacuum with PBE0 or PBEP86 from the experimental values in  $\text{CDCl}_3$  and  $\text{CCl}_4$  (ppm). But conversion to chemical shifts was done using Eq. (1) instead of Eq. (3). Values are given for the complete carbon set (all), for only  $\text{sp}^2$  carbons ( $\text{sp}^2$ ) and for only  $\text{sp}^3$  carbons ( $\text{sp}^3$ ).

| DFT Method | Exp. Solvent    | $^1\text{H}$ |               |               | $^{13}\text{C}$ |               |               |
|------------|-----------------|--------------|---------------|---------------|-----------------|---------------|---------------|
|            |                 | all          | $\text{sp}^2$ | $\text{sp}^3$ | all             | $\text{sp}^2$ | $\text{sp}^3$ |
| PBE0       | $\text{CCl}_4$  | 0.64         | 0.64          | 0.24          | 12.4            | 12.4          | 6.24          |
| PBEP86     | $\text{CCl}_4$  | 0.57         | 0.47          | 0.29          | 11.4            | 11.4          | 7.31          |
| PBE0       | $\text{CDCl}_3$ | 0.57         | 0.57          | 0.31          | 9.41            | 9.41          | 5.98          |
| PBEP86     | $\text{CDCl}_3$ | 0.73         | 0.44          | 0.36          | 11.2            | 11.2          | 6.80          |

Table S9: Cf. Table 3 in the main text: RMSD (ppm) between  $^1\text{H}$  and  $^{13}\text{C}$  shifts calculated in vacuum and experimental values in  $\text{CDCl}_3$  or  $\text{CCl}_4$ . But conversion to chemical shifts was done using Eq. (2) instead of Eq. (3). Two variants are given for each entry: conversion based on shifts of bridgehead CH of adamantane (left) or the innermost CH pairs of anthracene, respectively.

| DFT Method | Exp. Solvt.     | $^1\text{H}$ |               |               | $^{13}\text{C}$ |               |               |
|------------|-----------------|--------------|---------------|---------------|-----------------|---------------|---------------|
|            |                 | all          | $\text{sp}^2$ | $\text{sp}^3$ | all             | $\text{sp}^2$ | $\text{sp}^3$ |
| PBE0       | $\text{CCl}_4$  | 0.31/0.38    | 0.45/0.15     | 0.13/0.47     | 2.38/2.44       | 2.71/2.11     | 1.94/2.86     |
| PBEP86     | $\text{CCl}_4$  | 0.29/0.44    | 0.41/0.26     | 0.13/0.53     | 2.20/2.25       | 2.19/1.70     | 2.12/2.72     |
| PBE0       | $\text{CDCl}_3$ | 0.26/0.35    | 0.37/0.16     | 0.11/0.43     | 1.95/2.26       | 2.03/1.69     | 1.91/2.88     |
| PBEP86     | $\text{CDCl}_3$ | 0.23/0.42    | 0.32/0.26     | 0.11/0.49     | 2.12/2.32       | 2.06/1.83     | 2.06/2.70     |

Table S10: MAD (ppm) of  $^1\text{H}$  and  $^{13}\text{C}$  shifts calculated in vacuum with PBE0 or PBEP86 from the experimental values in  $\text{CDCl}_3$  and  $\text{CCl}_4$ . But conversion to chemical shifts was done using Eq. (2) instead of Eq. (3). Two variants are given for each entry: conversion based on shifts of bridgehead CH of adamantane (left) or the innermost CH pairs of anthracene, respectively.

| DFT Method | Exp. Solvt.     | $^1\text{H}$ |               |               | $^{13}\text{C}$ |               |               |
|------------|-----------------|--------------|---------------|---------------|-----------------|---------------|---------------|
|            |                 | all          | $\text{sp}^2$ | $\text{sp}^3$ | all             | $\text{sp}^2$ | $\text{sp}^3$ |
| PBE0       | $\text{CCl}_4$  | 0.25/0.32    | 0.44/0.12     | 0.32/0.68     | 1.89/1.97       | 2.12/1.61     | 1.58/2.53     |
| PBEP86     | $\text{CCl}_4$  | 0.23/0.40    | 0.39/0.23     | 0.11/0.52     | 1.78/1.75       | 1.78/1.28     | 1.75/2.33     |
| PBE0       | $\text{CDCl}_3$ | 0.20/0.30    | 0.35/0.13     | 0.08/0.42     | 1.59/1.85       | 1.64/1.32     | 1.59/2.59     |
| PBEP86     | $\text{CDCl}_3$ | 0.19/0.38    | 0.30/0.23     | 0.09/0.48     | 1.70/1.86       | 1.64/1.41     | 1.71/2.38     |

Table S11: Max. AD (ppm) of  $^1\text{H}$  and  $^{13}\text{C}$  shifts calculated in vacuum with PBE0 or PBEP86 from the experimental values in  $\text{CDCl}_3$  and  $\text{CCl}_4$ . But conversion to chemical shifts was done using Eq. (2) instead of Eq. (3). Two variants are given for each entry: conversion based on shifts of bridgehead CH of adamantane (left) or the innermost CH pairs of anthracene, respectively.

| DFT Method | Exp. Solvt.     | $^1\text{H}$ |               |               | $^{13}\text{C}$ |               |               |
|------------|-----------------|--------------|---------------|---------------|-----------------|---------------|---------------|
|            |                 | all          | $\text{sp}^2$ | $\text{sp}^3$ | all             | $\text{sp}^2$ | $\text{sp}^3$ |
| PBE0       | $\text{CCl}_4$  | 0.75/0.76    | 0.75/0.46     | 0.32/0.68     | 7.54/6.40       | 7.54/6.40     | 4.85/5.99     |
| PBEP86     | $\text{CCl}_4$  | 0.62/1.04    | 0.62/0.62     | 0.33/0.75     | 6.75/7.50       | 5.60/4.84     | 4.95/5.70     |
| PBE0       | $\text{CDCl}_3$ | 0.68/0.83    | 0.68/0.44     | 0.28/0.66     | 4.93/5.92       | 4.93/4.64     | 4.76/5.92     |
| PBEP86     | $\text{CDCl}_3$ | 0.60/1.11    | 0.60/0.60     | 0.30/0.73     | 7.76/8.53       | 5.76/4.99     | 4.47/5.24     |

**Comparison of experimental data to shielding calculations using CPCM and geometries reoptimized with the corresponding implicit solvent (PBE0 & PBEP86)**

Table S12: MAD (ppm) of  $^1\text{H}$  and  $^{13}\text{C}$  shifts calculated in the corresponding implicit solvent with PBE0 or PBEP86 with geometries reoptimized using CPCM from the experimental values in  $\text{CDCl}_3$  and  $\text{CCl}_4$ . Values are given for the complete carbon set (all), for only the  $\text{sp}^2$  carbons ( $\text{sp}^2$ ) and for only  $\text{sp}^3$  carbons ( $\text{sp}^3$ ).

| DFT Method | Exp. Solvent    | $^1\text{H}$ |               |               | $^{13}\text{C}$ |               |               |
|------------|-----------------|--------------|---------------|---------------|-----------------|---------------|---------------|
|            |                 | all          | $\text{sp}^2$ | $\text{sp}^3$ | all             | $\text{sp}^2$ | $\text{sp}^3$ |
| PBE0       | $\text{CCl}_4$  | 0.08         | 0.07          | 0.06          | 1.59            | 1.19          | 0.90          |
| PBEP86     | $\text{CCl}_4$  | 0.07         | 0.08          | 0.05          | 1.22            | 0.83          | 0.82          |
| PBE0       | $\text{CDCl}_3$ | 0.08         | 0.08          | 0.06          | 1.42            | 1.26          | 0.89          |
| PBEP86     | $\text{CDCl}_3$ | 0.08         | 0.09          | 0.05          | 1.07            | 0.89          | 0.78          |

Table S13: Max. AD (ppm) of  $^1\text{H}$  and  $^{13}\text{C}$  shifts calculated in the corresponding implicit solvent with PBE0 or PBEP86 with geometries reoptimized using CPCM from the experimental values in  $\text{CDCl}_3$  and  $\text{CCl}_4$ . Values are given for the complete carbon set (all), for only  $\text{sp}^2$  carbons ( $\text{sp}^2$ ) and for only  $\text{sp}^3$  carbons ( $\text{sp}^3$ ).

| DFT Method | Exp. Solvent    | $^1\text{H}$ |               |               | $^{13}\text{C}$ |               |               |
|------------|-----------------|--------------|---------------|---------------|-----------------|---------------|---------------|
|            |                 | all          | $\text{sp}^2$ | $\text{sp}^3$ | all             | $\text{sp}^2$ | $\text{sp}^3$ |
| PBE0       | $\text{CCl}_4$  | 0.27         | 0.22          | 0.18          | 9.63            | 9.12          | 2.42          |
| PBEP86     | $\text{CCl}_4$  | 0.42         | 0.29          | 0.18          | 5.46            | 5.30          | 2.52          |
| PBE0       | $\text{CDCl}_3$ | 0.27         | 0.21          | 0.17          | 9.16            | 8.81          | 2.42          |
| PBEP86     | $\text{CDCl}_3$ | 0.41         | 0.31          | 0.16          | 4.73            | 4.76          | 2.20          |

Table S14: Intercept (ppm) and slope of the linear regression of  $^1\text{H}$  and  $^{13}\text{C}$  shifts calculated in the corresponding implicit solvent with PBE0 or PBEP86 with geometries reoptimized using CPCM versus the experimental values in  $\text{CDCl}_3$  and  $\text{CCl}_4$ . Values are given for the complete carbon set (all), for only the  $\text{sp}^2$  carbons ( $\text{sp}^2$ ) and for only  $\text{sp}^3$  carbons ( $\text{sp}^3$ ).

| DFT Method | Exp. Solvent    | $^1\text{H}$ |               |               | $^{13}\text{C}$ |               |               |
|------------|-----------------|--------------|---------------|---------------|-----------------|---------------|---------------|
|            |                 | all          | $\text{sp}^2$ | $\text{sp}^3$ | all             | $\text{sp}^2$ | $\text{sp}^3$ |
| PBE0       | $\text{CCl}_4$  | 31.407       | 30.902        | 31.344        | 186.47          | 195.35        | 186.45        |
|            |                 | -1.072       | -1.006        | -1.033        | -1.052          | -1.112        | -1.065        |
| PBEP86     | $\text{CCl}_4$  | 31.307       | 30.801        | 31.261        | 187.55          | 193.57        | 188.23        |
|            |                 | -1.061       | -0.995        | -1.032        | -1.051          | -1.091        | -1.082        |
| PBE0       | $\text{CDCl}_3$ | 31.409       | 30.934        | 31.332        | 186.55          | 192.35        | 186.62        |
|            |                 | -1.068       | -1.006        | -1.023        | -1.048          | -1.085        | -1.058        |
| PBEP86     | $\text{CDCl}_3$ | 31.310       | 30.842        | 31.250        | 187.67          | 191.03        | 188.41        |
|            |                 | -1.057       | -0.997        | -1.022        | -1.047          | -1.069        | -1.076        |



Table S15: Cf. Table 5 in the main text: RMSD (ppm) between  $^1\text{H}$  and  $^{13}\text{C}$  shifts calculated in the corresponding implicit solvent with geometries reoptimized using CPCM and experimental values in  $\text{CDCl}_3$  or  $\text{CCl}_4$ . But conversion to chemical shifts was done using Eq. (1) instead of Eq. (3).

| DFT Method | Exp. Solvt.     | $^1\text{H}$ |               |               | $^{13}\text{C}$ |               |               |
|------------|-----------------|--------------|---------------|---------------|-----------------|---------------|---------------|
|            |                 | all          | $\text{sp}^2$ | $\text{sp}^3$ | all             | $\text{sp}^2$ | $\text{sp}^3$ |
| PBE0       | $\text{CCl}_4$  | 0.30         | 0.45          | 0.09          | 7.52            | 9.15          | 4.26          |
| PBEP86     | $\text{CCl}_4$  | 0.25         | 0.37          | 0.07          | 8.09            | 9.71          | 5.11          |
| PBE0       | $\text{CDCl}_3$ | 0.25         | 0.42          | 0.08          | 7.18            | 8.69          | 4.14          |
| PBEP86     | $\text{CDCl}_3$ | 0.23         | 0.34          | 0.07          | 7.81            | 9.35          | 4.97          |

Table S16: MAD (ppm) of  $^1\text{H}$  and  $^{13}\text{C}$  shifts calculated in the corresponding implicit solvent with PBE0 or PBEP86 with geometries reoptimized using CPCM from the experimental values in  $\text{CDCl}_3$  and  $\text{CCl}_4$ . But conversion to chemical shifts was done using Eq. (1) instead of Eq. (3). Values are given for the complete carbon set (all), for only  $\text{sp}^2$  carbons ( $\text{sp}^2$ ) and for only  $\text{sp}^3$  carbons ( $\text{sp}^3$ ).

| DFT Method | Exp. Solvent    | $^1\text{H}$ |               |               | $^{13}\text{C}$ |               |               |
|------------|-----------------|--------------|---------------|---------------|-----------------|---------------|---------------|
|            |                 | all          | $\text{sp}^2$ | $\text{sp}^3$ | all             | $\text{sp}^2$ | $\text{sp}^3$ |
| PBE0       | $\text{CCl}_4$  | 0.23         | 0.33          | 0.07          | 6.58            | 10.9          | 3.94          |
| PBEP86     | $\text{CCl}_4$  | 0.18         | 0.27          | 0.18          | 7.40            | 12.1          | 8.71          |
| PBE0       | $\text{CDCl}_3$ | 0.21         | 0.31          | 0.07          | 6.36            | 10.5          | 3.83          |
| PBEP86     | $\text{CDCl}_3$ | 0.17         | 0.24          | 0.06          | 7.21            | 11.8          | 4.68          |

Table S17: Max. AD (ppm) of  $^1\text{H}$  and  $^{13}\text{C}$  shifts calculated in the corresponding implicit solvent with PBE0 or PBEP86 with geometries reoptimized using CPCM from the experimental values in  $\text{CDCl}_3$  and  $\text{CCl}_4$ . But conversion to chemical shifts was done using Eq. (1) instead of Eq. (3). Values are given for the complete carbon set (all), for only  $\text{sp}^2$  carbons ( $\text{sp}^2$ ) and for only  $\text{sp}^3$  carbons ( $\text{sp}^3$ ).

| DFT Method | Exp. Solvent    | $^1\text{H}$ |               |               | $^{13}\text{C}$ |               |               |
|------------|-----------------|--------------|---------------|---------------|-----------------|---------------|---------------|
|            |                 | all          | $\text{sp}^2$ | $\text{sp}^3$ | all             | $\text{sp}^2$ | $\text{sp}^3$ |
| PBE0       | $\text{CCl}_4$  | 0.63         | 0.63          | 0.23          | 19.5            | 19.5          | 6.68          |
| PBEP86     | $\text{CCl}_4$  | 0.64         | 0.64          | 0.18          | 16.6            | 16.6          | 8.71          |
| PBE0       | $\text{CDCl}_3$ | 0.61         | 0.61          | 0.21          | 18.7            | 13.6          | 6.64          |
| PBEP86     | $\text{CDCl}_3$ | 0.63         | 0.63          | 0.14          | 15.6            | 9.48          | 7.75          |

Table S18: Cf. Table 5 in the main text: RMSD (ppm) between  $^1\text{H}$  and  $^{13}\text{C}$  shifts calculated in the corresponding implicit solvent with geometries reoptimized using CPCM and experimental values in  $\text{CDCl}_3$  or  $\text{CCl}_4$ . But conversion to chemical shifts was done using Eq. (2) instead of Eq. (3). Two variants are given for each entry: conversion based on shifts of bridgehead CH of adamantane (left) or the innermost CH pairs of anthracene, respectively. Values are given for the complete carbon set (all), for only  $\text{sp}^2$  carbons ( $\text{sp}^2$ ) and for only  $\text{sp}^3$  carbons ( $\text{sp}^3$ ).

| DFT Method | Exp. Solvt.     | $^1\text{H}$ |               |               | $^{13}\text{C}$ |               |               |
|------------|-----------------|--------------|---------------|---------------|-----------------|---------------|---------------|
|            |                 | all          | $\text{sp}^2$ | $\text{sp}^3$ | all             | $\text{sp}^2$ | $\text{sp}^3$ |
| PBE0       | $\text{CCl}_4$  | 0.40/0.46    | 0.58/0.19     | 0.18/0.59     | 3.89/3.65       | 4.79/3.91     | 2.07/3.31     |
| PBEP86     | $\text{CCl}_4$  | 0.38/0.53    | 0.54/0.30     | 0.19/0.64     | 3.48/3.28       | 4.11/3.32     | 2.30/3.18     |
| PBE0       | $\text{CDCl}_3$ | 0.38/0.48    | 0.55/0.22     | 0.17/0.60     | 3.56/3.36       | 4.32/3.33     | 2.00/3.41     |
| PBEP86     | $\text{CDCl}_3$ | 0.36/0.54    | 0.51/0.33     | 0.17/0.65     | 3.20/3.02       | 3.74/2.80     | 2.20/3.24     |

Table S19: MAD (ppm) of  $^1\text{H}$  and  $^{13}\text{C}$  shifts calculated in the corresponding implicit solvent with PBE0 or PBEP86 with geometries reoptimized using CPCM from the experimental values in  $\text{CDCl}_3$  and  $\text{CCl}_4$ . But conversion to chemical shifts was done using Eq. (2) instead of Eq. (3). Two variants are given for each entry: conversion based on shifts of bridgehead CH of adamantane (left) or the innermost CH pairs of anthracene, respectively. Values are given for the complete carbon set (all), for only  $\text{sp}^2$  carbons ( $\text{sp}^2$ ) and for only  $\text{sp}^3$  carbons ( $\text{sp}^3$ ).

| DFT Method | Exp. Solvt.     | $^1\text{H}$ |               |               | $^{13}\text{C}$ |               |               |
|------------|-----------------|--------------|---------------|---------------|-----------------|---------------|---------------|
|            |                 | all          | $\text{sp}^2$ | $\text{sp}^3$ | all             | $\text{sp}^2$ | $\text{sp}^3$ |
| PBE0       | $\text{CCl}_4$  | 0.33/0.41    | 0.57/0.17     | 0.16/0.58     | 2.74/2.80       | 3.42/2.67     | 1.67/2.89     |
| PBEP86     | $\text{CCl}_4$  | 0.32/0.49    | 0.53/0.28     | 0.34/0.64     | 2.67/2.50       | 10.4/9.18     | 5.90/7.08     |
| PBE0       | $\text{CDCl}_3$ | 0.31/0.42    | 0.54/0.20     | 0.14/0.60     | 2.58/2.68       | 3.19/2.36     | 1.60/3.04     |
| PBEP86     | $\text{CDCl}_3$ | 0.30/0.50    | 0.50/0.31     | 0.16/0.65     | 2.55/2.37       | 3.03/1.99     | 1.80/2.78     |

Table S20: Max. AD (ppm) of  $^1\text{H}$  and  $^{13}\text{C}$  shifts calculated in the corresponding implicit solvent with PBE0 or PBEP86 with geometries reoptimized using CPCM from the experimental values in  $\text{CDCl}_3$  and  $\text{CCl}_4$ . But conversion to chemical shifts was done using Eq. (2) instead of Eq. (3). Two variants are given for each entry: conversion based on shifts of bridgehead CH of adamantane (left) or the innermost CH pairs of anthracene, respectively. Values are given for the complete carbon set (all), for only  $\text{sp}^2$  carbons ( $\text{sp}^2$ ) and for only  $\text{sp}^3$  carbons ( $\text{sp}^3$ ).

| DFT Method | Exp. Solvt.     | $^1\text{H}$ |               |               | $^{13}\text{C}$ |               |               |
|------------|-----------------|--------------|---------------|---------------|-----------------|---------------|---------------|
|            |                 | all          | $\text{sp}^2$ | $\text{sp}^3$ | all             | $\text{sp}^2$ | $\text{sp}^3$ |
| PBE0       | $\text{CCl}_4$  | 0.75/0.79    | 0.75/0.39     | 0.36/0.79     | 14.3/12.7       | 14.3/12.7     | 5.13/6.74     |
| PBEP86     | $\text{CCl}_4$  | 0.81/0.82    | 0.81/0.58     | 0.34/0.82     | 10.4/9.18       | 10.4/9.18     | 5.90/7.08     |
| PBE0       | $\text{CDCl}_3$ | 0.75/0.76    | 0.75/0.37     | 0.34/0.76     | 13.6/11.8       | 13.6/11.8     | 5.08/6.86     |
| PBEP86     | $\text{CDCl}_3$ | 0.81/0.81    | 0.81/0.61     | 0.33/0.81     | 9.48/8.14       | 9.48/8.14     | 5.31/6.65     |

## Comparison of experimental data to shielding calculations using CPCM and geometries optimized in vacuum (PBE0 & PBEP86)

Table S21: RMSD (ppm) of the  $^1\text{H}$  and  $^{13}\text{C}$  shifts calculated in the corresponding implicit solvent with PBE0 or PBEP86 using the structures optimized in vacuum from the experimental values in  $\text{CDCl}_3$  and  $\text{CCl}_4$ . Values are given for the complete carbon set (all), for only the  $\text{sp}^2$  carbons ( $\text{sp}^2$ ) and for only  $\text{sp}^3$  carbons ( $\text{sp}^3$ ).

| DFT Method | Exp. Solvent    | $^1\text{H}$ |               |               | $^{13}\text{C}$ |               |               |
|------------|-----------------|--------------|---------------|---------------|-----------------|---------------|---------------|
|            |                 | all          | $\text{sp}^2$ | $\text{sp}^3$ | all             | $\text{sp}^2$ | $\text{sp}^3$ |
| PBE0       | $\text{CCl}_4$  | 0.09         | 0.08          | 0.08          | 1.87            | 1.73          | 1.09          |
| PBEP86     | $\text{CCl}_4$  | 0.10         | 0.11          | 0.07          | 1.37            | 1.17          | 0.92          |
| PBE0       | $\text{CDCl}_3$ | 0.10         | 0.10          | 0.08          | 1.73            | 1.77          | 1.14          |
| PBEP86     | $\text{CDCl}_3$ | 0.10         | 0.12          | 0.07          | 1.27            | 1.22          | 0.92          |

Table S22: MAD (ppm) of  $^1\text{H}$  and  $^{13}\text{C}$  shifts calculated in the corresponding implicit solvent with PBE0 or PBEP86 using the structures optimized in vacuum from the experimental values in  $\text{CDCl}_3$  and  $\text{CCl}_4$ . Values are given for the complete carbon set (all), for only  $\text{sp}^2$  carbons ( $\text{sp}^2$ ) and for only  $\text{sp}^3$  carbons ( $\text{sp}^3$ ).

| DFT Method | Exp. Solvent    | $^1\text{H}$ |               |               | $^{13}\text{C}$ |               |               |
|------------|-----------------|--------------|---------------|---------------|-----------------|---------------|---------------|
|            |                 | all          | $\text{sp}^2$ | $\text{sp}^3$ | all             | $\text{sp}^2$ | $\text{sp}^3$ |
| PBE0       | $\text{CCl}_4$  | 0.07         | 0.07          | 0.06          | 1.45            | 1.17          | 0.87          |
| PBEP86     | $\text{CCl}_4$  | 0.07         | 0.08          | 0.05          | 1.11            | 0.84          | 0.74          |
| PBE0       | $\text{CDCl}_3$ | 0.08         | 0.08          | 0.06          | 1.34            | 1.25          | 0.92          |
| PBEP86     | $\text{CDCl}_3$ | 0.09         | 0.10          | 0.05          | 1.01            | 0.93          | 0.75          |

Table S23: Max. AD (ppm) of  $^1\text{H}$  and  $^{13}\text{C}$  shifts calculated in the corresponding implicit solvent with PBE0 or PBEP86 using the structures optimized in vacuum from the experimental values in  $\text{CDCl}_3$  and  $\text{CCl}_4$ . Values are given for the complete carbon set (all), for only  $\text{sp}^2$  carbons ( $\text{sp}^2$ ) and for only  $\text{sp}^3$  carbons ( $\text{sp}^3$ ).

| DFT Method | Exp. Solvent    | $^1\text{H}$ |               |               | $^{13}\text{C}$ |               |               |
|------------|-----------------|--------------|---------------|---------------|-----------------|---------------|---------------|
|            |                 | all          | $\text{sp}^2$ | $\text{sp}^3$ | all             | $\text{sp}^2$ | $\text{sp}^3$ |
| PBE0       | $\text{CCl}_4$  | 0.32         | 0.34          | 0.23          | 8.30            | 7.99          | 2.58          |
| PBEP86     | $\text{CCl}_4$  | 0.40         | 0.28          | 0.19          | 4.35            | 4.17          | 2.13          |
| PBE0       | $\text{CDCl}_3$ | 0.25         | 0.21          | 0.20          | 7.72            | 7.57          | 2.86          |
| PBEP86     | $\text{CDCl}_3$ | 0.38         | 0.30          | 0.19          | 4.18            | 3.46          | 2.11          |

Table S24: Intercept (ppm) and slope of the linear regression of  $^1\text{H}$  and  $^{13}\text{C}$  shifts calculated in the corresponding implicit solvent with PBE0 or PBEP86 using the structures optimized in vacuum versus the experimental values in  $\text{CDCl}_3$  and  $\text{CCl}_4$ . Values are given for the complete carbon set (all), for only  $\text{sp}^2$  carbons ( $\text{sp}^2$ ) and for only  $\text{sp}^3$  carbons ( $\text{sp}^3$ ).

| DFT Method | Exp. Solvent    | $^1\text{H}$ |               |               | $^{13}\text{C}$ |               |               |
|------------|-----------------|--------------|---------------|---------------|-----------------|---------------|---------------|
|            |                 | all          | $\text{sp}^2$ | $\text{sp}^3$ | all             | $\text{sp}^2$ | $\text{sp}^3$ |
| PBE0       | $\text{CCl}_4$  | 31.417       | 30.948        | 31.350        | 186.27          | 193.20        | 186.41        |
|            |                 | -1.071       | -1.010        | -1.031        | -1.047          | -1.093        | -1.062        |
| PBEP86     | $\text{CCl}_4$  | 31.317       | 30.853        | 31.267        | 187.37          | 191.54        | 188.19        |
|            |                 | -1.061       | -1.000        | -1.030        | -1.046          | -1.074        | -1.078        |
| PBE0       | $\text{CDCl}_3$ | 31.419       | 30.984        | 31.338        | 186.35          | 190.28        | 186.057       |
|            |                 | -1.020       | -1.011        | -1.021        | -1.042          | -1.068        | -1.054        |
| PBEP86     | $\text{CDCl}_3$ | 31.320       | 30.897        | 31.256        | 187.48          | 189.05        | 188.36        |
|            |                 | -1.057       | -1.002        | -1.020        | -1.042          | -1.052        | -1.072        |

Table S25: RMSD (ppm) between  $^1\text{H}$  and  $^{13}\text{C}$  shifts calculated in the corresponding implicit solvent with geometries optimized in vacuum and experimental values in  $\text{CDCl}_3$  or  $\text{CCl}_4$ . But conversion to chemical shifts was done using Eq. (1) instead of Eq. (3).

| DFT Method | Exp. Solvt.     | $^1\text{H}$ |               |               | $^{13}\text{C}$ |               |               |
|------------|-----------------|--------------|---------------|---------------|-----------------|---------------|---------------|
|            |                 | all          | $\text{sp}^2$ | $\text{sp}^3$ | all             | $\text{sp}^2$ | $\text{sp}^3$ |
| PBE0       | $\text{CCl}_4$  | 0.24         | 0.35          | 0.10          | 6.03            | 7.33          | 3.67          |
| PBEP86     | $\text{CCl}_4$  | 0.19         | 0.26          | 0.11          | 6.63            | 7.90          | 4.49          |
| PBE0       | $\text{CDCl}_3$ | 0.20         | 0.27          | 0.13          | 5.06            | 6.13          | 3.26          |
| PBEP86     | $\text{CDCl}_3$ | 0.17         | 0.18          | 0.15          | 5.78            | 6.86          | 4.07          |

Table S26: MAD (ppm) of  $^1\text{H}$  and  $^{13}\text{C}$  shifts calculated in the corresponding implicit solvent with PBE0 or PBEP86 with geometries optimized in vacuum from the experimental values in  $\text{CDCl}_3$  and  $\text{CCl}_4$ . But conversion to chemical shifts was done using Eq. (1) instead of Eq. (3). Values are given for the complete carbon set (all), for only  $\text{sp}^2$  carbons ( $\text{sp}^2$ ) and for only  $\text{sp}^3$  carbons ( $\text{sp}^3$ ).

| DFT Method | Exp. Solvent    | $^1\text{H}$ |               |               | $^{13}\text{C}$ |               |               |
|------------|-----------------|--------------|---------------|---------------|-----------------|---------------|---------------|
|            |                 | all          | $\text{sp}^2$ | $\text{sp}^3$ | all             | $\text{sp}^2$ | $\text{sp}^3$ |
| PBE0       | $\text{CCl}_4$  | 0.19         | 0.25          | 0.08          | 5.42            | 8.98          | 3.39          |
| PBEP86     | $\text{CCl}_4$  | 0.15         | 0.18          | 0.08          | 6.20            | 10.0          | 4.21          |
| PBE0       | $\text{CDCl}_3$ | 0.17         | 0.18          | 0.11          | 4.61            | 7.61          | 3.00          |
| PBEP86     | $\text{CDCl}_3$ | 0.14         | 0.12          | 0.12          | 5.41            | 8.66          | 3.82          |

Table S27: Max. AD (ppm) of  $^1\text{H}$  and  $^{13}\text{C}$  shifts calculated in the corresponding implicit solvent with PBE0 or PBEP86 with geometries optimized in vacuum from the experimental values in  $\text{CDCl}_3$  and  $\text{CCl}_4$ . But conversion to chemical shifts was done using Eq. (1) instead of Eq. (3). Values are given for the complete carbon set (all), for only  $\text{sp}^2$  carbons ( $\text{sp}^2$ ) and for only  $\text{sp}^3$  carbons ( $\text{sp}^3$ ).

| DFT Method | Exp. Solvent    | $^1\text{H}$ |               |               | $^{13}\text{C}$ |               |               |
|------------|-----------------|--------------|---------------|---------------|-----------------|---------------|---------------|
|            |                 | all          | $\text{sp}^2$ | $\text{sp}^3$ | all             | $\text{sp}^2$ | $\text{sp}^3$ |
| PBE0       | $\text{CCl}_4$  | 0.63         | 0.63          | 0.28          | 14.0            | 14.0          | 6.18          |
| PBEP86     | $\text{CCl}_4$  | 0.50         | 0.47          | 0.33          | 11.5            | 11.5          | 7.33          |
| PBE0       | $\text{CDCl}_3$ | 0.56         | 0.56          | 0.35          | 10.0            | 10.0          | 5.92          |
| PBEP86     | $\text{CDCl}_3$ | 0.66         | 0.43          | 0.40          | 11.3            | 11.3          | 6.82          |

Table S28: RMSD (ppm) between  $^1\text{H}$  and  $^{13}\text{C}$  shifts calculated in the corresponding implicit solvent with geometries optimized in vacuum and experimental values in  $\text{CDCl}_3$  or  $\text{CCl}_4$ . But conversion to chemical shifts was done using Eq. (2) instead of Eq. (3). Two variants are given for each entry: conversion based on shifts of bridgehead CH of adamantane (left) or the innermost CH pairs of anthracene, respectively. Values are given for the complete carbon set (all), for only  $\text{sp}^2$  carbons ( $\text{sp}^2$ ) and for only  $\text{sp}^3$  carbons ( $\text{sp}^3$ ).

| DFT Method | Exp. Solvt.     | $^1\text{H}$ |               |               | $^{13}\text{C}$ |               |               |
|------------|-----------------|--------------|---------------|---------------|-----------------|---------------|---------------|
|            |                 | all          | $\text{sp}^2$ | $\text{sp}^3$ | all             | $\text{sp}^2$ | $\text{sp}^3$ |
| PBE0       | $\text{CCl}_4$  | 0.32/0.38    | 0.47/0.16     | 0.13/0.48     | 2.73/2.72       | 2.55/2.55     | 1.97/3.01     |
| PBEP86     | $\text{CCl}_4$  | 0.29/0.45    | 0.42/0.26     | 0.14/0.54     | 2.43/2.44       | 2.55/1.94     | 2.19/2.89     |
| PBE0       | $\text{CDCl}_3$ | 0.26/0.35    | 0.38/0.16     | 0.11/0.44     | 2.10/2.36       | 2.29/1.75     | 1.92/3.02     |
| PBEP86     | $\text{CDCl}_3$ | 0.24/0.42    | 0.33/0.26     | 0.12/0.50     | 2.12/2.31       | 2.02/1.60     | 2.11/2.86     |

Table S29: MAD (ppm) of  $^1\text{H}$  and  $^{13}\text{C}$  shifts calculated in the corresponding implicit solvent with PBE0 or PBEP86 with geometries optimized in vacuum from the experimental values in  $\text{CDCl}_3$  and  $\text{CCl}_4$  (ppm). But conversion to chemical shifts was done using Eq. (2) instead of Eq. (3). Two variants are given for each entry: conversion based on shifts of bridgehead CH of adamantane (left) or the innermost CH pairs of anthracene, respectively. Values are given for the complete carbon set (all), for only  $sp^2$  carbons ( $sp^2$ ) and for only  $sp^3$  carbons ( $sp^3$ ).

| DFT Method | Exp. Solvt.     | $^1\text{H}$ |           |           | $^{13}\text{C}$ |           |           |
|------------|-----------------|--------------|-----------|-----------|-----------------|-----------|-----------|
|            |                 | all          | $sp^2$    | $sp^3$    | all             | $sp^2$    | $sp^3$    |
| PBE0       | $\text{CCl}_4$  | 0.25/0.32    | 0.45/0.12 | 0.11/0.47 | 2.10/2.17       | 2.49/1.88 | 1.60/2.66 |
| PBEP86     | $\text{CCl}_4$  | 0.24/0.41    | 0.40/0.23 | 0.12/0.53 | 1.99/1.92       | 2.10/1.47 | 1.81/2.50 |
| PBE0       | $\text{CDCl}_3$ | 0.20/0.30    | 0.36/0.13 | 0.09/0.43 | 1.71/1.93       | 1.87/1.36 | 1.57/2.72 |
| PBEP86     | $\text{CDCl}_3$ | 0.19/0.38    | 0.31/0.23 | 0.09/0.49 | 1.66/1.82       | 1.56/1.23 | 1.73/2.51 |

Table S30: Max. AD (ppm) of  $^1\text{H}$  and  $^{13}\text{C}$  shifts calculated in the corresponding implicit solvent with PBE0 or PBEP86 with geometries optimized in vacuum from the experimental values in  $\text{CDCl}_3$  and  $\text{CCl}_4$  (ppm). But conversion to chemical shifts was done using Eq. (2) instead of Eq. (3). Two variants are given for each entry: conversion based on shifts of bridgehead CH of adamantane (left) or the innermost CH pairs of anthracene, respectively. Values are given for the complete carbon set (all), for only  $sp^2$  carbons ( $sp^2$ ) and for only  $sp^3$  carbons ( $sp^3$ ).

| DFT Method | Exp. Solvt.     | $^1\text{H}$ |           |           | $^{13}\text{C}$ |           |           |
|------------|-----------------|--------------|-----------|-----------|-----------------|-----------|-----------|
|            |                 | all          | $sp^2$    | $sp^3$    | all             | $sp^2$    | $sp^3$    |
| PBE0       | $\text{CCl}_4$  | 0.76/0.73    | 0.76/0.45 | 0.32/0.73 | 9.27/7.97       | 9.27/7.97 | 4.99/6.29 |
| PBEP86     | $\text{CCl}_4$  | 0.64/0.97    | 0.64/0.61 | 0.33/0.80 | 6.90/7.79       | 5.75/4.85 | 5.46/6.36 |
| PBE0       | $\text{CDCl}_3$ | 0.69/0.76    | 0.69/0.43 | 0.28/0.71 | 5.61/6.22       | 5.61/4.29 | 4.90/6.22 |
| PBEP86     | $\text{CDCl}_3$ | 0.60/1.04    | 0.60/0.59 | 0.30/0.78 | 7.91/8.82       | 5.91/5.00 | 4.68/5.60 |

**Comparison of experimental data to vacuum calculations with PBE0/pcSseg-3 and PBEP86/cc-pVTZ (cross-validation)**

Table S31: RMSD (ppm) between  $^1\text{H}$  and  $^{13}\text{C}$  shifts calculated in vacuum and experimental values in  $\text{CDCl}_3$  or  $\text{CCl}_4$ . Values are given for the complete carbon set (all), for only  $sp^2$  carbons ( $sp^2$ ) and for only  $sp^3$  carbons ( $sp^3$ ).

| DFT Method     | Exp. Solvent    | $^1\text{H}$ |        |        | $^{13}\text{C}$ |        |        |
|----------------|-----------------|--------------|--------|--------|-----------------|--------|--------|
|                |                 | all          | $sp^2$ | $sp^3$ | all             | $sp^2$ | $sp^3$ |
| PBE0/pcSseg-3  | $\text{CCl}_4$  | 0.10         | 0.10   | 0.09   | 1.36            | 1.49   | 1.03   |
| PBEP86/cc-pVTZ | $\text{CCl}_4$  | 0.12         | 0.11   | 0.10   | 1.33            | 1.36   | 0.93   |
| PBE0/pcSseg-3  | $\text{CDCl}_3$ | 0.11         | 0.10   | 0.09   | 1.47            | 1.66   | 1.08   |
| PBEP86/cc-pVTZ | $\text{CDCl}_3$ | 0.13         | 0.12   | 0.12   | 1.89            | 1.88   | 1.02   |

Table S32: MAD (ppm) of  $^1\text{H}$  and  $^{13}\text{C}$  shifts calculated in vacuum from the experimental values in  $\text{CDCl}_3$  and  $\text{CCl}_4$ . Values are given for the complete carbon set (all), for only  $sp^2$  carbons ( $sp^2$ ) and for only  $sp^3$  carbons ( $sp^3$ ).

| DFT Method     | Exp. Solvent    | $^1\text{H}$ |        |        | $^{13}\text{C}$ |        |        |
|----------------|-----------------|--------------|--------|--------|-----------------|--------|--------|
|                |                 | all          | $sp^2$ | $sp^3$ | all             | $sp^2$ | $sp^3$ |
| PBE0/pcSseg-3  | $\text{CCl}_4$  | 0.08         | 0.08   | 0.07   | 1.05            | 1.09   | 0.83   |
| PBEP86/cc-pVTZ | $\text{CCl}_4$  | 0.09         | 0.09   | 0.08   | 1.00            | 1.02   | 0.74   |
| PBE0/pcSseg-3  | $\text{CDCl}_3$ | 0.09         | 0.08   | 0.07   | 1.12            | 1.32   | 0.87   |
| PBEP86/cc-pVTZ | $\text{CDCl}_3$ | 0.10         | 0.09   | 0.09   | 1.41            | 1.44   | 0.84   |

Table S33: Max. AD (ppm) of  $^1\text{H}$  and  $^{13}\text{C}$  shifts calculated in vacuum from the experimental values in  $\text{CDCl}_3$  and  $\text{CCl}_4$ . Values are given for the complete carbon set (all), for only  $sp^2$  carbons ( $sp^2$ ) and for only  $sp^3$  carbons ( $sp^3$ ).

| DFT Method     | Exp. Solvent    | $^1\text{H}$ |        |        | $^{13}\text{C}$ |        |        |
|----------------|-----------------|--------------|--------|--------|-----------------|--------|--------|
|                |                 | all          | $sp^2$ | $sp^3$ | all             | $sp^2$ | $sp^3$ |
| PBE0/pcSseg-3  | $\text{CCl}_4$  | 0.32         | 0.29   | 0.22   | 5.73            | 5.67   | 2.54   |
| PBEP86/cc-pVTZ | $\text{CCl}_4$  | 0.52         | 0.43   | 0.28   | 5.49            | 4.19   | 2.81   |
| PBE0/pcSseg-3  | $\text{CDCl}_3$ | 0.43         | 0.32   | 0.24   | 5.35            | 4.82   | 2.80   |
| PBEP86/cc-pVTZ | $\text{CDCl}_3$ | 0.63         | 0.40   | 0.33   | 6.68            | 5.92   | 2.98   |

Table S34: Intercept (ppm) and slope of the linear regression of  $^1\text{H}$  and  $^{13}\text{C}$  shifts calculated in vacuum versus the experimental values in  $\text{CDCl}_3$  and  $\text{CCl}_4$ . Values are given for the complete carbon set (all), for only  $sp^2$  carbons ( $sp^2$ ) and for only  $sp^3$  carbons ( $sp^3$ ).

| DFT Method     | Exp. Solvent    | $^1\text{H}$ |        |        | $^{13}\text{C}$ |        |        |
|----------------|-----------------|--------------|--------|--------|-----------------|--------|--------|
|                |                 | all          | $sp^2$ | $sp^3$ | all             | $sp^2$ | $sp^3$ |
| PBE0/pcSseg-3  | $\text{CCl}_4$  | 31.363       | 31.068 | 31.276 | 181.63          | 183.89 | 181.95 |
|                |                 | -0.999       | -0.993 | -0.992 | -0.999          | -0.997 | -0.996 |
| PBEP86/cc-pVTZ | $\text{CCl}_4$  | 31.545       | 31.239 | 31.434 | 189.70          | 187.98 | 190.72 |
|                |                 | -1.042       | -1.004 | -0.984 | -0.995          | -0.983 | -1.024 |
| PBE0/pcSseg-3  | $\text{CDCl}_3$ | 31.396       | 31.210 | 31.274 | 181.29          | 178.10 | 181.83 |
|                |                 | -1.062       | -1.040 | -1.001 | -1.063          | -1.041 | -1.073 |
| PBEP86/cc-pVTZ | $\text{CDCl}_3$ | 31.577       | 31.379 | 31.429 | 189.37          | 182.66 | 190.60 |
|                |                 | -1.034       | -1.010 | -0.960 | -0.984          | -0.939 | -1.010 |

Table S35: RMSD (ppm) between  $^1\text{H}$  and  $^{13}\text{C}$  shifts calculated in vacuum and experimental values in  $\text{CDCl}_3$  or  $\text{CCl}_4$ . But conversion to chemical shifts was done using Eq. (1) instead of Eq. (3). Values are given for the complete carbon set (all), for only  $sp^2$  carbons ( $sp^2$ ) and for only  $sp^3$  carbons ( $sp^3$ ).

| DFT Method     | Exp. Solvent    | $^1\text{H}$ |        |        | $^{13}\text{C}$ |        |        |
|----------------|-----------------|--------------|--------|--------|-----------------|--------|--------|
|                |                 | all          | $sp^2$ | $sp^3$ | all             | $sp^2$ | $sp^3$ |
| PBE0/pcSseg-3  | $\text{CCl}_4$  | 0.27         | 0.41   | 0.09   | 10.4            | 13.0   | 5.42   |
| PBEP86/cc-pVTZ | $\text{CCl}_4$  | 0.18         | 0.22   | 0.12   | 2.99            | 2.84   | 3.14   |
| PBE0/pcSseg-3  | $\text{CDCl}_3$ | 0.23         | 0.32   | 0.11   | 9.46            | 11.8   | 4.99   |
| PBEP86/cc-pVTZ | $\text{CDCl}_3$ | 0.17         | 0.15   | 0.17   | 2.79            | 2.82   | 2.77   |

Table S36: MAD (ppm) of  $^1\text{H}$  and  $^{13}\text{C}$  shifts calculated in vacuum from the experimental values in  $\text{CDCl}_3$  and  $\text{CCl}_4$ . But conversion to chemical shifts was done using Eq. (1) instead of Eq. (3). Values are given for the complete carbon set (all), for only  $sp^2$  carbons ( $sp^2$ ) and for only  $sp^3$  carbons ( $sp^3$ ).

| DFT Method     | Exp. Solvent    | $^1\text{H}$ |        |        | $^{13}\text{C}$ |        |        |
|----------------|-----------------|--------------|--------|--------|-----------------|--------|--------|
|                |                 | all          | $sp^2$ | $sp^3$ | all             | $sp^2$ | $sp^3$ |
| PBE0/pcSseg-3  | $\text{CCl}_4$  | 0.21         | 0.29   | 0.07   | 9.43            | 16.5   | 5.08   |
| PBEP86/cc-pVTZ | $\text{CCl}_4$  | 0.14         | 0.15   | 0.09   | 2.72            | 3.27   | 2.96   |
| PBE0/pcSseg-3  | $\text{CDCl}_3$ | 0.18         | 0.22   | 0.09   | 8.63            | 15.1   | 4.68   |
| PBEP86/cc-pVTZ | $\text{CDCl}_3$ | 0.13         | 0.10   | 0.13   | 2.50            | 3.21   | 2.57   |

Table S37: Max. AD (ppm) of  $^1\text{H}$  and  $^{13}\text{C}$  shifts calculated in vacuum from the experimental values in  $\text{CDCl}_3$  and  $\text{CCl}_4$ . But conversion to chemical shifts was done using Eq. (1) instead of Eq. (3). Values are given for the complete carbon set (all), for only  $sp^2$  carbons ( $sp^2$ ) and for only  $sp^3$  carbons ( $sp^3$ ).

| DFT Method     | Exp. Solvent    | $^1\text{H}$ |        |        | $^{13}\text{C}$ |        |        |
|----------------|-----------------|--------------|--------|--------|-----------------|--------|--------|
|                |                 | all          | $sp^2$ | $sp^3$ | all             | $sp^2$ | $sp^3$ |
| PBE0/pcSseg-3  | $\text{CCl}_4$  | 0.71         | 0.71   | 0.23   | 20.8            | 20.8   | 8.57   |
| PBEP86/cc-pVTZ | $\text{CCl}_4$  | 0.57         | 0.39   | 0.34   | 6.36            | 6.36   | 5.02   |
| PBE0/pcSseg-3  | $\text{CDCl}_3$ | 0.66         | 0.66   | 0.27   | 17.0            | 17.0   | 8.06   |
| PBEP86/cc-pVTZ | $\text{CDCl}_3$ | 0.73         | 0.32   | 0.41   | 6.71            | 6.71   | 4.51   |

Table S38: RMSD (ppm) between  $^1\text{H}$  and  $^{13}\text{C}$  shifts calculated in vacuum and experimental values in  $\text{CDCl}_3$  or  $\text{CCl}_4$ . But conversion to chemical shifts was done using Eq. (2) instead of Eq. (3). Two variants are given for each entry conversion based on shifts of bridgehead CH of adamantane (left) or the innermost CH pairs of anthracene, respectively. Values are given for the complete carbon set (all), for only  $sp^2$  carbons ( $sp^2$ ) and for only  $sp^3$  carbons ( $sp^3$ ).

| DFT Method     | Exp. Solvt.     | $^1\text{H}$ |           |           | $^{13}\text{C}$ |           |           |
|----------------|-----------------|--------------|-----------|-----------|-----------------|-----------|-----------|
|                |                 | all          | $sp^2$    | $sp^3$    | all             | $sp^2$    | $sp^3$    |
| PBE0/pcSseg-3  | $\text{CCl}_4$  | 0.36/0.42    | 0.53/0.14 | 0.15/0.53 | 5.46/4.82       | 7.04/3.20 | 2.24/6.47 |
| PBEP86/cc-pVTZ | $\text{CCl}_4$  | 0.24/0.39    | 0.34/0.23 | 0.12/0.47 | 2.41/1.36       | 2.60/1.41 | 1.99/1.14 |
| PBE0/pcSseg-3  | $\text{CDCl}_3$ | 0.30/0.39    | 0.44/0.17 | 0.12/0.49 | 4.74/4.51       | 6.10/2.19 | 2.12/6.48 |
| PBEP86/cc-pVTZ | $\text{CDCl}_3$ | 0.19/0.37    | 0.23/0.23 | 0.12/0.43 | 3.20/2.10       | 3.77/2.54 | 2.02/1.13 |

Table S39: MAD (ppm) of  $^1\text{H}$  and  $^{13}\text{C}$  shifts calculated in vacuum from the experimental values in  $\text{CDCl}_3$  and  $\text{CCl}_4$ . But conversion to chemical shifts was done using Eq. (2) instead of Eq. (3). Two variants are given for each entry: conversion based on shifts of bridgehead CH of adamantane (left) or the innermost CH pairs of anthracene, respectively. Values are given for the complete carbon set (all), for only  $\text{sp}^2$  carbons ( $\text{sp}^2$ ) and for only  $\text{sp}^3$  carbons ( $\text{sp}^3$ ).

| DFT Method     | Exp. Solvt.     | $^1\text{H}$ |               |               | $^{13}\text{C}$ |               |               |
|----------------|-----------------|--------------|---------------|---------------|-----------------|---------------|---------------|
|                |                 | all          | $\text{sp}^2$ | $\text{sp}^3$ | all             | $\text{sp}^2$ | $\text{sp}^3$ |
| PBE0/pcSseg-3  | $\text{CCl}_4$  | 0.29/0.36    | 0.52/0.14     | 0.12/0.52     | 4.42/3.89       | 6.43/2.30     | 1.82/6.19     |
| PBEP86/cc-pVTZ | $\text{CCl}_4$  | 0.19/0.35    | 0.32/0.20     | 0.10/0.46     | 2.06/1.02       | 2.29/1.03     | 1.71/0.94     |
| PBE0/pcSseg-3  | $\text{CDCl}_3$ | 0.23/0.34    | 0.43/0.14     | 0.09/0.48     | 3.95/3.62       | 5.73/1.72     | 1.72/6.25     |
| PBEP86/cc-pVTZ | $\text{CDCl}_3$ | 0.16/0.33    | 0.23/0.20     | 0.10/0.41     | 2.50/1.40       | 2.99/1.68     | 1.74/0.94     |

Table S40: Max. AD (ppm) of  $^1\text{H}$  and  $^{13}\text{C}$  shifts calculated in vacuum from the experimental values in  $\text{CDCl}_3$  and  $\text{CCl}_4$ . But conversion to chemical shifts was done using Eq. (2) instead of Eq. (3). Two variants are given for each entry: conversion based on shifts of bridgehead CH of adamantane (left) or the innermost CH pairs of anthracene, respectively.

| DFT Method     | Exp. Solvt.     | $^1\text{H}$ |               |               | $^{13}\text{C}$ |               |               |
|----------------|-----------------|--------------|---------------|---------------|-----------------|---------------|---------------|
|                |                 | all          | $\text{sp}^2$ | $\text{sp}^3$ | all             | $\text{sp}^2$ | $\text{sp}^3$ |
| PBE0/pcSseg-3  | $\text{CCl}_4$  | 0.84/0.81    | 0.84/0.44     | 0.36/0.71     | 14.5/10.6       | 14.5/9.55     | 5.57/10.6     |
| PBEP86/cc-pVTZ | $\text{CCl}_4$  | 0.52/0.95    | 0.52/0.63     | 0.31/0.72     | 7.36/5.19       | 5.53/3.86     | 3.97/2.53     |
| PBE0/pcSseg-3  | $\text{CDCl}_3$ | 0.79/0.88    | 0.79/0.42     | 0.31/0.69     | 11.1/10.5       | 11.1/6.12     | 5.48/10.5     |
| PBEP86/cc-pVTZ | $\text{CDCl}_3$ | 0.60/1.02    | 0.43/0.61     | 0.28/0.70     | 11.0/8.87       | 11.0/8.87     | 4.41/2.36     |



**Comparison of experimental data to shielding calculations using CPCM and geometries reoptimized with the corresponding implicit solvent with PBE0/pcSseg-3 and PBEP86/cc-pVTZ (cross-validation)**

Table S41: RMSD (ppm) between  $^1\text{H}$  and  $^{13}\text{C}$  shifts calculated in the corresponding implicit solvent with geometries reoptimized using CPCM from the experimental values in  $\text{CDCl}_3$  or  $\text{CCl}_4$ . Values are given for the complete carbon set (all), for only  $sp^2$  carbons ( $sp^2$ ) and for only  $sp^3$  carbons ( $sp^3$ ).

| DFT Method     | Exp. Solvent    | $^1\text{H}$ |        |        | $^{13}\text{C}$ |        |        |
|----------------|-----------------|--------------|--------|--------|-----------------|--------|--------|
|                |                 | all          | $sp^2$ | $sp^3$ | all             | $sp^2$ | $sp^3$ |
| PBE0/pcSseg-3  | $\text{CCl}_4$  | 0.09         | 0.08   | 0.07   | 2.12            | 1.92   | 1.11   |
| PBEP86/cc-pVTZ | $\text{CCl}_4$  | 0.11         | 0.11   | 0.07   | 1.44            | 1.20   | 0.98   |
| PBE0/pcSseg-3  | $\text{CDCl}_3$ | 0.09         | 0.09   | 0.07   | 1.93            | 1.93   | 1.11   |
| PBEP86/cc-pVTZ | $\text{CDCl}_3$ | 0.11         | 0.13   | 0.07   | 1.29            | 1.23   | 0.95   |

Table S42: MAD (ppm) of  $^1\text{H}$  and  $^{13}\text{C}$  shifts calculated in the corresponding implicit solvent with geometries reoptimized using CPCM from the experimental values in  $\text{CDCl}_3$  and  $\text{CCl}_4$ . Values are given for the complete carbon set (all), for only the  $sp^2$  carbons ( $sp^2$ ) and for only  $sp^3$  carbons ( $sp^3$ ).

| DFT Method     | Exp. Solvent    | $^1\text{H}$ |        |        | $^{13}\text{C}$ |        |        |
|----------------|-----------------|--------------|--------|--------|-----------------|--------|--------|
|                |                 | all          | $sp^2$ | $sp^3$ | all             | $sp^2$ | $sp^3$ |
| PBE0/pcSseg-3  | $\text{CCl}_4$  | 0.07         | 0.07   | 0.06   | 1.61            | 1.22   | 0.91   |
| PBEP86/cc-pVTZ | $\text{CCl}_4$  | 0.08         | 0.08   | 0.06   | 1.14            | 0.85   | 0.78   |
| PBE0/pcSseg-3  | $\text{CDCl}_3$ | 0.07         | 0.08   | 0.06   | 1.46            | 1.26   | 0.90   |
| PBEP86/cc-pVTZ | $\text{CDCl}_3$ | 0.08         | 0.06   | 0.10   | 1.01            | 1.23   | 0.77   |

Table S43: Max. AD (ppm) of  $^1\text{H}$  and  $^{13}\text{C}$  shifts calculated in the corresponding implicit solvent with geometries reoptimized using CPCM from the experimental values in  $\text{CDCl}_3$  and  $\text{CCl}_4$ . Values are given for the complete carbon set (all), for only  $sp^2$  carbons ( $sp^2$ ) and for only  $sp^3$  carbons ( $sp^3$ ).

| DFT Method     | Exp. Solvent    | $^1\text{H}$ |        |        | $^{13}\text{C}$ |        |        |
|----------------|-----------------|--------------|--------|--------|-----------------|--------|--------|
|                |                 | all          | $sp^2$ | $sp^3$ | all             | $sp^2$ | $sp^3$ |
| PBE0/pcSseg-3  | $\text{CCl}_4$  | 0.26         | 0.19   | 0.17   | 10.4            | 9.86   | 2.48   |
| PBEP86/cc-pVTZ | $\text{CCl}_4$  | 0.42         | 0.32   | 0.19   | 4.62            | 4.54   | 2.91   |
| PBE0/pcSseg-3  | $\text{CDCl}_3$ | 0.28         | 0.25   | 0.18   | 10.0            | 9.64   | 2.48   |
| PBEP86/cc-pVTZ | $\text{CDCl}_3$ | 0.41         | 0.33   | 0.18   | 3.86            | 3.87   | 2.59   |

Table S44: Intercept (ppm) and slope of the linear regression of  $^1\text{H}$  and  $^{13}\text{C}$  shifts calculated in the corresponding implicit solvent with geometries reoptimized using CPCM versus the experimental values in  $\text{CDCl}_3$  and  $\text{CCl}_4$ . Values are given for the complete carbon set (all), for only the  $sp^2$  carbons ( $sp^2$ ) and for only  $sp^3$  carbons ( $sp^3$ ).

| DFT Method     | Exp. Solvent    | $^1\text{H}$ |        |        | $^{13}\text{C}$ |        |        |
|----------------|-----------------|--------------|--------|--------|-----------------|--------|--------|
|                |                 | all          | $sp^2$ | $sp^3$ | all             | $sp^2$ | $sp^3$ |
| PBE0/pcSseg-3  | $\text{CCl}_4$  | 31.292       | 30.787 | 31.249 | 182.66          | 192.04 | 182.64 |
|                |                 | -1.081       | -1.015 | -1.052 | -1.095          | -1.158 | -1.109 |
| PBEP86/cc-pVTZ | $\text{CCl}_4$  | 31.482       | 30.981 | 31.410 | 190.71          | 195.55 | 191.36 |
|                |                 | -1.053       | -0.986 | -1.011 | -1.014          | -1.046 | -1.042 |
| PBE0/pcSseg-3  | $\text{CDCl}_3$ | 31.293       | 30.817 | 31.237 | 182.75          | 189.10 | 182.83 |
|                |                 | -1.077       | -1.015 | -1.042 | -1.091          | -1.132 | -1.103 |
| PBEP86/cc-pVTZ | $\text{CDCl}_3$ | 31.486       | 31.023 | 31.399 | 190.81          | 192.92 | 191.52 |
|                |                 | -1.049       | -0.989 | -1.000 | -1.010          | -1.023 | -1.035 |

Table S45: RMSD (ppm) between  $^1\text{H}$  and  $^{13}\text{C}$  shifts calculated in the corresponding implicit solvent with geometries reoptimized using CPCM and experimental values in  $\text{CDCl}_3$  or  $\text{CCl}_4$ . But conversion to chemical shifts was done using Eq. (1) instead of Eq. (3). Values are given for the complete carbon set (all), for only  $\text{sp}^2$  carbons ( $\text{sp}^2$ ) and for only  $\text{sp}^3$  carbons ( $\text{sp}^3$ ).

| DFT Method     | Exp. Solvt.     | $^1\text{H}$ |               |               | $^{13}\text{C}$ |               |               |
|----------------|-----------------|--------------|---------------|---------------|-----------------|---------------|---------------|
|                |                 | all          | $\text{sp}^2$ | $\text{sp}^3$ | all             | $\text{sp}^2$ | $\text{sp}^3$ |
| PBE0/pcSseg-3  | $\text{CCl}_4$  | 0.34         | 0.51          | 0.10          | 12.3            | 15.3          | 6.07          |
| PBEP86/cc-pVTZ | $\text{CCl}_4$  | 0.22         | 0.32          | 0.08          | 4.22            | 4.53          | 3.63          |
| PBE0/pcSseg-3  | $\text{CDCl}_3$ | 0.32         | 0.48          | 0.09          | 12.0            | 14.9          | 5.97          |
| PBEP86/cc-pVTZ | $\text{CDCl}_3$ | 0.20         | 0.29          | 0.08          | 3.91            | 4.12          | 3.47          |

Table S46: MAD (ppm) of  $^1\text{H}$  and  $^{13}\text{C}$  shifts calculated in the corresponding implicit solvent with geometries reoptimized using CPCM from the experimental values in  $\text{CDCl}_3$  and  $\text{CCl}_4$ . But conversion to chemical shifts was done using Eq. (1) instead of Eq. (3). Values are given for the complete carbon set (all), for only  $\text{sp}^2$  carbons ( $\text{sp}^2$ ) and for only  $\text{sp}^3$  carbons ( $\text{sp}^3$ ).

| DFT Method     | Exp. Solvent    | $^1\text{H}$ |               |               | $^{13}\text{C}$ |               |               |
|----------------|-----------------|--------------|---------------|---------------|-----------------|---------------|---------------|
|                |                 | all          | $\text{sp}^2$ | $\text{sp}^3$ | all             | $\text{sp}^2$ | $\text{sp}^3$ |
| PBE0/pcSseg-3  | $\text{CCl}_4$  | 0.26         | 0.38          | 0.09          | 10.8            | 18.9          | 5.63          |
| PBEP86/cc-pVTZ | $\text{CCl}_4$  | 0.16         | 0.22          | 0.06          | 3.89            | 5.42          | 3.41          |
| PBE0/pcSseg-3  | $\text{CDCl}_3$ | 0.24         | 0.35          | 0.07          | 10.6            | 18.6          | 6.56          |
| PBEP86/cc-pVTZ | $\text{CDCl}_3$ | 0.15         | 0.20          | 0.07          | 3.65            | 5.01          | 3.27          |

Table S47: Max. AD (ppm) of  $^1\text{H}$  and  $^{13}\text{C}$  shifts calculated in the corresponding implicit solvent with geometries reoptimized using CPCM from the experimental values in  $\text{CDCl}_3$  and  $\text{CCl}_4$ . But conversion to chemical shifts was done using Eq. (1) instead of Eq. (3). Values are given for the complete carbon set (all), for only  $\text{sp}^2$  carbons ( $\text{sp}^2$ ) and for only  $\text{sp}^3$  carbons ( $\text{sp}^3$ ).

| DFT Method     | Exp. Solvent    | $^1\text{H}$ |               |               | $^{13}\text{C}$ |               |               |
|----------------|-----------------|--------------|---------------|---------------|-----------------|---------------|---------------|
|                |                 | all          | $\text{sp}^2$ | $\text{sp}^3$ | all             | $\text{sp}^2$ | $\text{sp}^3$ |
| PBE0/pcSseg-3  | $\text{CCl}_4$  | 0.71         | 0.71          | 0.25          | 27.7            | 27.7          | 9.70          |
| PBEP86/cc-pVTZ | $\text{CCl}_4$  | 0.55         | 0.55          | 0.21          | 9.33            | 9.33          | 6.13          |
| PBE0/pcSseg-3  | $\text{CDCl}_3$ | 0.72         | 0.72          | 0.23          | 26.8            | 26.8          | 9.27          |
| PBEP86/cc-pVTZ | $\text{CDCl}_3$ | 0.55         | 0.55          | 0.20          | 8.10            | 8.10          | 5.21          |

Table S48: RMSD (ppm) between  $^1\text{H}$  and  $^{13}\text{C}$  shifts calculated in the corresponding implicit solvent with geometries reoptimized using CPCM and experimental values in  $\text{CDCl}_3$  or  $\text{CCl}_4$ . But conversion to chemical shifts was done using Eq. (2) instead of Eq. (3). Two variants are given for each entry: conversion based on shifts of bridgehead CH of adamantane (left) or the innermost CH pairs of anthracene, respectively. Values are given for the complete carbon set (all), for only  $\text{sp}^2$  carbons ( $\text{sp}^2$ ) and for only  $\text{sp}^3$  carbons ( $\text{sp}^3$ ).

| DFT Method     | Exp. Solvt.     | $^1\text{H}$ |               |               | $^{13}\text{C}$ |               |               |
|----------------|-----------------|--------------|---------------|---------------|-----------------|---------------|---------------|
|                |                 | all          | $\text{sp}^2$ | $\text{sp}^3$ | all             | $\text{sp}^2$ | $\text{sp}^3$ |
| PBE0/pcSseg-3  | $\text{CCl}_4$  | 0.46/0.51    | 0.65/0.20     | 0.21/0.65     | 7.12/5.96       | 9.18/5.29     | 2.49/6.89     |
| PBEP86/cc-pVTZ | $\text{CCl}_4$  | 0.32/0.48    | 0.46/0.28     | 0.15/0.58     | 2.02/1.75       | 1.94/1.94     | 2.06/1.25     |
| PBE0/pcSseg-3  | $\text{CDCl}_3$ | 0.43/0.52    | 0.63/0.23     | 0.20/0.65     | 6.88/5.75       | 8.84/4.74     | 2.40/6.98     |
| PBEP86/cc-pVTZ | $\text{CDCl}_3$ | 0.30/0.49    | 0.43/0.31     | 0.14/0.59     | 1.89/1.44       | 1.74/1.51     | 2.00/1.16     |

Table S49: MAD (ppm) of  $^1\text{H}$  and  $^{13}\text{C}$  shifts calculated in the corresponding implicit solvent with geometries reoptimized using CPCM from the experimental values in  $\text{CDCl}_3$  and  $\text{CCl}_4$ . But conversion to chemical shifts was done using Eq. (2) instead of Eq. (3). Two variants are given for each entry: conversion based on shifts of bridgehead CH of adamantane (left) or the innermost CH pairs of anthracene, respectively. Values are given for the complete carbon set (all), for only  $\text{sp}^2$  carbons ( $\text{sp}^2$ ) and for only  $\text{sp}^3$  carbons ( $\text{sp}^3$ ).

| DFT Method     | Exp. Solvt.     | $^1\text{H}$ |               |               | $^{13}\text{C}$ |               |               |
|----------------|-----------------|--------------|---------------|---------------|-----------------|---------------|---------------|
|                |                 | all          | $\text{sp}^2$ | $\text{sp}^3$ | all             | $\text{sp}^2$ | $\text{sp}^3$ |
| PBE0/pcSseg-3  | $\text{CCl}_4$  | 0.39/0.44    | 0.65/0.18     | 0.19/0.64     | 5.42/4.73       | 7.89/3.45     | 2.03/6.51     |
| PBEP86/cc-pVTZ | $\text{CCl}_4$  | 0.26/0.44    | 0.45/0.26     | 0.13/0.57     | 1.71/1.27       | 1.69/1.34     | 1.71/1.02     |
| PBE0/pcSseg-3  | $\text{CDCl}_3$ | 0.37/0.46    | 0.62/0.21     | 0.18/0.65     | 5.32/4.62       | 7.76/3.17     | 1.96/6.63     |
| PBEP86/cc-pVTZ | $\text{CDCl}_3$ | 0.24/0.46    | 0.42/0.28     | 0.12/0.58     | 1.59/1.08       | 1.52/1.06     | 1.65/0.97     |

Table S50: Max. AD (ppm) of  $^1\text{H}$  and  $^{13}\text{C}$  shifts calculated in the corresponding implicit solvent with geometries reoptimized using CPCM from the experimental values in  $\text{CDCl}_3$  and  $\text{CCl}_4$ . But conversion to chemical shifts was done using Eq. (2) instead of Eq. (3). Two variants are given for each entry: conversion based on shifts of bridgehead CH of adamantane (left) or the innermost CH pairs of anthracene, respectively. Values are given for the complete carbon set (all), for only  $\text{sp}^2$  carbons ( $\text{sp}^2$ ) and for only  $\text{sp}^3$  carbons ( $\text{sp}^3$ ).

| DFT Method     | Exp. Solvt.     | $^1\text{H}$ |               |               | $^{13}\text{C}$ |               |               |
|----------------|-----------------|--------------|---------------|---------------|-----------------|---------------|---------------|
|                |                 | all          | $\text{sp}^2$ | $\text{sp}^3$ | all             | $\text{sp}^2$ | $\text{sp}^3$ |
| PBE0/pcSseg-3  | $\text{CCl}_4$  | 0.86/0.83    | 0.86/0.37     | 0.40/0.83     | 21.0/15.5       | 21.0/15.5     | 5.84/11.3     |
| PBEP86/cc-pVTZ | $\text{CCl}_4$  | 0.70/0.76    | 0.70/0.57     | 0.32/0.76     | 5.41/6.02       | 4.29/6.02     | 4.76/3.04     |
| PBE0/pcSseg-3  | $\text{CDCl}_3$ | 0.86/0.83    | 0.86/0.36     | 0.38/0.83     | 20.2/14.6       | 20.2/14.6     | 5.77/11.4     |
| PBEP86/cc-pVTZ | $\text{CDCl}_3$ | 0.70/0.75    | 0.70/0.63     | 0.30/0.75     | 5.28/4.76       | 4.14/4.76     | 4.23/2.67     |

**Comparison of experimental data to shielding calculations using CPCM and geometries optimized in vacuum with with PBE0/pcSseg-3 and PBEP86/cc-pVTZ (cross-validation)**

Table S51: RMSD (ppm) of the  $^1\text{H}$  and  $^{13}\text{C}$  shifts calculated in the corresponding implicit solvent using the structures optimized in vacuum from the experimental values in  $\text{CDCl}_3$  and  $\text{CCl}_4$ . Values are given for the complete carbon set (all), for only the  $\text{sp}^2$  carbons ( $\text{sp}^2$ ) and for only  $\text{sp}^3$  carbons ( $\text{sp}^3$ ).

| DFT Method     | Exp. Solvent    | $^1\text{H}$ |               |               | $^{13}\text{C}$ |               |               |
|----------------|-----------------|--------------|---------------|---------------|-----------------|---------------|---------------|
|                |                 | all          | $\text{sp}^2$ | $\text{sp}^3$ | all             | $\text{sp}^2$ | $\text{sp}^3$ |
| PBE0/pcSseg-3  | $\text{CCl}_4$  | 0.09         | 0.08          | 0.07          | 1.92            | 1.79          | 1.11          |
| PBEP86/cc-pVTZ | $\text{CCl}_4$  | 0.11         | 0.12          | 0.07          | 1.31            | 1.20          | 0.87          |
| PBE0/pcSseg-3  | $\text{CDCl}_3$ | 0.09         | 0.10          | 0.07          | 1.79            | 1.83          | 1.16          |
| PBEP86/cc-pVTZ | $\text{CDCl}_3$ | 0.11         | 0.13          | 0.08          | 1.26            | 1.29          | 0.89          |

Table S52: MAD (ppm) of  $^1\text{H}$  and  $^{13}\text{C}$  shifts calculated in the corresponding implicit solvent using the structures optimized in vacuum from the experimental values in  $\text{CDCl}_3$  and  $\text{CCl}_4$ . Values are given for the complete carbon set (all), for only  $\text{sp}^2$  carbons ( $\text{sp}^2$ ) and for only  $\text{sp}^3$  carbons ( $\text{sp}^3$ ).

| DFT Method     | Exp. Solvent    | $^1\text{H}$ |               |               | $^{13}\text{C}$ |               |               |
|----------------|-----------------|--------------|---------------|---------------|-----------------|---------------|---------------|
|                |                 | all          | $\text{sp}^2$ | $\text{sp}^3$ | all             | $\text{sp}^2$ | $\text{sp}^3$ |
| PBE0/pcSseg-3  | $\text{CCl}_4$  | 0.07         | 0.07          | 0.06          | 1.47            | 1.19          | 0.90          |
| PBEP86/cc-pVTZ | $\text{CCl}_4$  | 0.08         | 0.08          | 0.06          | 1.03            | 0.88          | 0.71          |
| PBE0/pcSseg-3  | $\text{CDCl}_3$ | 0.07         | 0.08          | 0.06          | 1.38            | 1.25          | 0.95          |
| PBEP86/cc-pVTZ | $\text{CDCl}_3$ | 0.09         | 0.10          | 0.06          | 0.98            | 0.98          | 0.73          |

Table S53: Max. AD (ppm) of  $^1\text{H}$  and  $^{13}\text{C}$  shifts calculated in the corresponding implicit solvent using the structures optimized in vacuum from the experimental values in  $\text{CDCl}_3$  and  $\text{CCl}_4$ . Values are given for the complete carbon set (all), for only  $\text{sp}^2$  carbons ( $\text{sp}^2$ ) and for only  $\text{sp}^3$  carbons ( $\text{sp}^3$ ).

| DFT Method     | Exp. Solvent    | $^1\text{H}$ |               |               | $^{13}\text{C}$ |               |               |
|----------------|-----------------|--------------|---------------|---------------|-----------------|---------------|---------------|
|                |                 | all          | $\text{sp}^2$ | $\text{sp}^3$ | all             | $\text{sp}^2$ | $\text{sp}^3$ |
| PBE0/pcSseg-3  | $\text{CCl}_4$  | 0.24         | 0.19          | 0.17          | 9.04            | 8.70          | 2.57          |
| PBEP86/cc-pVTZ | $\text{CCl}_4$  | 0.39         | 0.33          | 0.20          | 3.66            | 3.44          | 1.89          |
| PBE0/pcSseg-3  | $\text{CDCl}_3$ | 0.26         | 0.23          | 0.17          | 8.56            | 8.37          | 2.84          |
| PBEP86/cc-pVTZ | $\text{CDCl}_3$ | 0.40         | 0.33          | 0.21          | 3.58            | 3.68          | 1.84          |

Table S54: Intercept (ppm) and slope of the linear regression of  $^1\text{H}$  and  $^{13}\text{C}$  shifts calculated in the corresponding implicit solvent using the structures optimized in vacuum versus the experimental values in  $\text{CDCl}_3$  and  $\text{CCl}_4$ . Values are given for the complete carbon set (all), for only  $\text{sp}^2$  carbons ( $\text{sp}^2$ ) and for only  $\text{sp}^3$  carbons ( $\text{sp}^3$ ).

| DFT Method     | Exp. Solvent    | $^1\text{H}$ |               |               | $^{13}\text{C}$ |               |               |
|----------------|-----------------|--------------|---------------|---------------|-----------------|---------------|---------------|
|                |                 | all          | $\text{sp}^2$ | $\text{sp}^3$ | all             | $\text{sp}^2$ | $\text{sp}^3$ |
| PBE0/pcSseg-3  | $\text{CCl}_4$  | 31.302       | 30.833        | 31.255        | 182.46          | 189.84        | 182.60        |
|                |                 | -1.080       | -1.050        | -1.019        | -1.090          | -1.105        | -1.139        |
| PBEP86/cc-pVTZ | $\text{CCl}_4$  | 31.491       | 31.033        | 31.417        | 190.53          | 193.56        | 191.32        |
|                |                 | -1.052       | -0.993        | -1.010        | -1.009          | -1.029        | -1.039        |
| PBE0/pcSseg-3  | $\text{CDCl}_3$ | 31.303       | 30.867        | 31.243        | 182.55          | 186.99        | 182.78        |
|                |                 | -1.076       | -1.020        | -1.040        | -1.086          | -1.114        | -1.098        |
| PBEP86/cc-pVTZ | $\text{CDCl}_3$ | 31.496       | 31.079        | 31.405        | 190.62          | 190.97        | 191.47        |
|                |                 | -1.048       | -0.995        | -0.999        | -1.005          | -1.006        | -1.031        |

Table S55: RMSD (ppm) between  $^1\text{H}$  and  $^{13}\text{C}$  shifts calculated in the corresponding implicit solvent with geometries optimized in vacuum and experimental values in  $\text{CDCl}_3$  or  $\text{CCl}_4$ . But conversion to chemical shifts was done using Eq. (1) instead of Eq. (3). Values are given for the complete carbon set (all), for only  $\text{sp}^2$  carbons ( $\text{sp}^2$ ) and for only  $\text{sp}^3$  carbons ( $\text{sp}^3$ ).

| DFT Method     | Exp. Solvt.     | $^1\text{H}$ |               |               | $^{13}\text{C}$ |               |               |
|----------------|-----------------|--------------|---------------|---------------|-----------------|---------------|---------------|
|                |                 | all          | $\text{sp}^2$ | $\text{sp}^3$ | all             | $\text{sp}^2$ | $\text{sp}^3$ |
| PBE0/pcSseg-3  | $\text{CCl}_4$  | 0.34         | 0.51          | 0.10          | 12.0            | 14.9          | 6.10          |
| PBEP86/cc-pVTZ | $\text{CCl}_4$  | 0.22         | 0.32          | 0.06          | 4.03            | 4.19          | 3.64          |
| PBE0/pcSseg-3  | $\text{CDCl}_3$ | 0.32         | 0.48          | 0.09          | 11.7            | 14.5          | 6.01          |
| PBEP86/cc-pVTZ | $\text{CDCl}_3$ | 0.20         | 0.29          | 0.08          | 3.76            | 3.84          | 3.48          |

Table S56: MAD (ppm) of  $^1\text{H}$  and  $^{13}\text{C}$  shifts calculated in the corresponding implicit solvent with geometries optimized in vacuum from the experimental values in  $\text{CDCl}_3$  and  $\text{CCl}_4$ . But conversion to chemical shifts was done using Eq. (1) instead of Eq. (3). Values are given for the complete carbon set (all), for only  $\text{sp}^2$  carbons ( $\text{sp}^2$ ) and for only  $\text{sp}^3$  carbons ( $\text{sp}^3$ ).

| DFT Method     | Exp. Solvent    | $^1\text{H}$ |               |               | $^{13}\text{C}$ |               |               |
|----------------|-----------------|--------------|---------------|---------------|-----------------|---------------|---------------|
|                |                 | all          | $\text{sp}^2$ | $\text{sp}^3$ | all             | $\text{sp}^2$ | $\text{sp}^3$ |
| PBE0/pcSseg-3  | $\text{CCl}_4$  | 0.26         | 0.38          | 0.08          | 10.7            | 18.5          | 5.69          |
| PBEP86/cc-pVTZ | $\text{CCl}_4$  | 0.16         | 0.22          | 0.06          | 3.77            | 5.09          | 3.46          |
| PBE0/pcSseg-3  | $\text{CDCl}_3$ | 0.24         | 0.35          | 0.08          | 10.51           | 18.2          | 5.61          |
| PBEP86/cc-pVTZ | $\text{CDCl}_3$ | 0.15         | 0.20          | 0.07          | 3.53            | 4.68          | 3.32          |

Table S57: Max. AD (ppm) of  $^1\text{H}$  and  $^{13}\text{C}$  shifts calculated in the corresponding implicit solvent with geometries optimized in vacuum from the experimental values in  $\text{CDCl}_3$  and  $\text{CCl}_4$ . But conversion to chemical shifts was done using Eq. (1) instead of Eq. (3). Values are given for the complete carbon set (all), for only  $\text{sp}^2$  carbons ( $\text{sp}^2$ ) and for only  $\text{sp}^3$  carbons ( $\text{sp}^3$ ).

| DFT Method     | Exp. Solvent    | $^1\text{H}$ |               |               | $^{13}\text{C}$ |               |               |
|----------------|-----------------|--------------|---------------|---------------|-----------------|---------------|---------------|
|                |                 | all          | $\text{sp}^2$ | $\text{sp}^3$ | all             | $\text{sp}^2$ | $\text{sp}^3$ |
| PBE0/pcSseg-3  | $\text{CCl}_4$  | 0.72         | 0.72          | 0.27          | 26.2            | 26.2          | 9.53          |
| PBEP86/cc-pVTZ | $\text{CCl}_4$  | 0.55         | 0.55          | 0.20          | 7.89            | 7.89          | 5.47          |
| PBE0/pcSseg-3  | $\text{CDCl}_3$ | 0.72         | 0.72          | 0.25          | 25.1            | 25.1          | 9.80          |
| PBEP86/cc-pVTZ | $\text{CDCl}_3$ | 0.54         | 0.54          | 0.24          | 7.46            | 7.46          | 5.19          |

Table S58: RMSD (ppm) between  $^1\text{H}$  and  $^{13}\text{C}$  shifts calculated in the corresponding implicit solvent with geometries optimized in vacuum and experimental values in  $\text{CDCl}_3$  or  $\text{CCl}_4$ . But conversion to chemical shifts was done using Eq. (2) instead of Eq. (3). Two variants are given for each entry: conversion based on shifts of bridgehead CH of adamantane (left) or the innermost CH pairs of anthracene, respectively. Values are given for the complete carbon set (all), for only  $\text{sp}^2$  carbons ( $\text{sp}^2$ ) and for only  $\text{sp}^3$  carbons ( $\text{sp}^3$ ).

| DFT Method     | Exp. Solvt.     | $^1\text{H}$ |               |               | $^{13}\text{C}$ |               |               |
|----------------|-----------------|--------------|---------------|---------------|-----------------|---------------|---------------|
|                |                 | all          | $\text{sp}^2$ | $\text{sp}^3$ | all             | $\text{sp}^2$ | $\text{sp}^3$ |
| PBE0/pcSseg-3  | $\text{CCl}_4$  | 0.44/0.50    | 0.64/0.20     | 0.20/0.44     | 6.70/5.62       | 8.59/4.73     | 2.45/6.74     |
| PBEP86/cc-pVTZ | $\text{CCl}_4$  | 0.31/0.47    | 0.45/0.28     | 0.15/0.57     | 1.95/1.52       | 1.87/1.60     | 2.00/1.15     |
| PBE0/pcSseg-3  | $\text{CDCl}_3$ | 0.42/0.51    | 0.61/0.23     | 0.19/0.65     | 6.47/5.44       | 8.27/4.20     | 2.38/6.83     |
| PBEP86/cc-pVTZ | $\text{CDCl}_3$ | 0.29/0.49    | 0.42/0.31     | 0.13/0.58     | 1.94/1.32       | 1.89/1.32     | 1.96/1.06     |

Table S59: MAD (ppm) of  $^1\text{H}$  and  $^{13}\text{C}$  shifts calculated in the corresponding implicit solvent with geometries optimized in vacuum from the experimental values in  $\text{CDCl}_3$  and  $\text{CCl}_4$ . But conversion to chemical shifts was done using Eq. (2) instead of Eq. (3). Two variants are given for each entry: conversion based on shifts of bridgehead CH of adamantane (left) or the innermost CH pairs of anthracene, respectively. Values are given for the complete carbon set (all), for only  $\text{sp}^2$  carbons ( $\text{sp}^2$ ) and for only  $\text{sp}^3$  carbons ( $\text{sp}^3$ ).

| DFT Method     | Exp. Solvt.     | $^1\text{H}$ |               |               | $^{13}\text{C}$ |               |               |
|----------------|-----------------|--------------|---------------|---------------|-----------------|---------------|---------------|
|                |                 | all          | $\text{sp}^2$ | $\text{sp}^3$ | all             | $\text{sp}^2$ | $\text{sp}^3$ |
| PBE0/pcSseg-3  | $\text{CCl}_4$  | 0.37/0.44    | 0.63/0.18     | 0.18/0.63     | 5.19/4.50       | 7.51/3.13     | 2.00/6.37     |
| PBEP86/cc-pVTZ | $\text{CCl}_4$  | 0.26/0.43    | 0.43/0.25     | 0.13/0.56     | 1.68/1.10       | 1.67/1.11     | 1.66/0.94     |
| PBE0/pcSseg-3  | $\text{CDCl}_3$ | 0.35/0.46    | 0.60/0.21     | 0.17/0.64     | 5.10/4.39       | 7.38/2.86     | 1.95/6.49     |
| PBEP86/cc-pVTZ | $\text{CDCl}_3$ | 0.24/0.45    | 0.40/0.28     | 0.11/0.58     | 1.66/1.00       | 1.67/0.98     | 1.66/0.88     |

Table S60: Max. AD (ppm) of  $^1\text{H}$  and  $^{13}\text{C}$  shifts calculated in the corresponding implicit solvent with geometries optimized in vacuum from the experimental values in  $\text{CDCl}_3$  and  $\text{CCl}_4$ . But conversion to chemical shifts was done using Eq. (2) instead of Eq. (3). Two variants are given for each entry: conversion based on shifts of bridgehead CH of adamantane (left) or the innermost CH pairs of anthracene, respectively. Values are given for the complete carbon set (all), for only  $\text{sp}^2$  carbons ( $\text{sp}^2$ ) and for only  $\text{sp}^3$  carbons ( $\text{sp}^3$ ).

| DFT Method     | Exp. Solvt.     | $^1\text{H}$ |               |               | $^{13}\text{C}$ |               |               |
|----------------|-----------------|--------------|---------------|---------------|-----------------|---------------|---------------|
|                |                 | all          | $\text{sp}^2$ | $\text{sp}^3$ | all             | $\text{sp}^2$ | $\text{sp}^3$ |
| PBE0/pcSseg-3  | $\text{CCl}_4$  | 0.85/0.83    | 0.85/0.38     | 0.40/0.83     | 19.4/14.1       | 19.4/14.1     | 5.67/11.0     |
| PBEP86/cc-pVTZ | $\text{CCl}_4$  | 0.69/0.76    | 0.69/0.58     | 0.32/0.76     | 5.25/4.65       | 4.22/4.65     | 4.23/2.36     |
| PBE0/pcSseg-3  | $\text{CDCl}_3$ | 0.86/0.81    | 0.86/0.41     | 0.38/0.81     | 18.5/13.0       | 18.5/13.0     | 5.60/11.0     |
| PBEP86/cc-pVTZ | $\text{CDCl}_3$ | 0.68/0.78    | 0.68/0.62     | 0.30/0.78     | 5.12/4.20       | 4.23/4.20     | 4.08/2.37     |

**Residual plots of experimental shifts and calculated shifts in vacuum using Eq. (3) with  $m = -1$  for conversion**

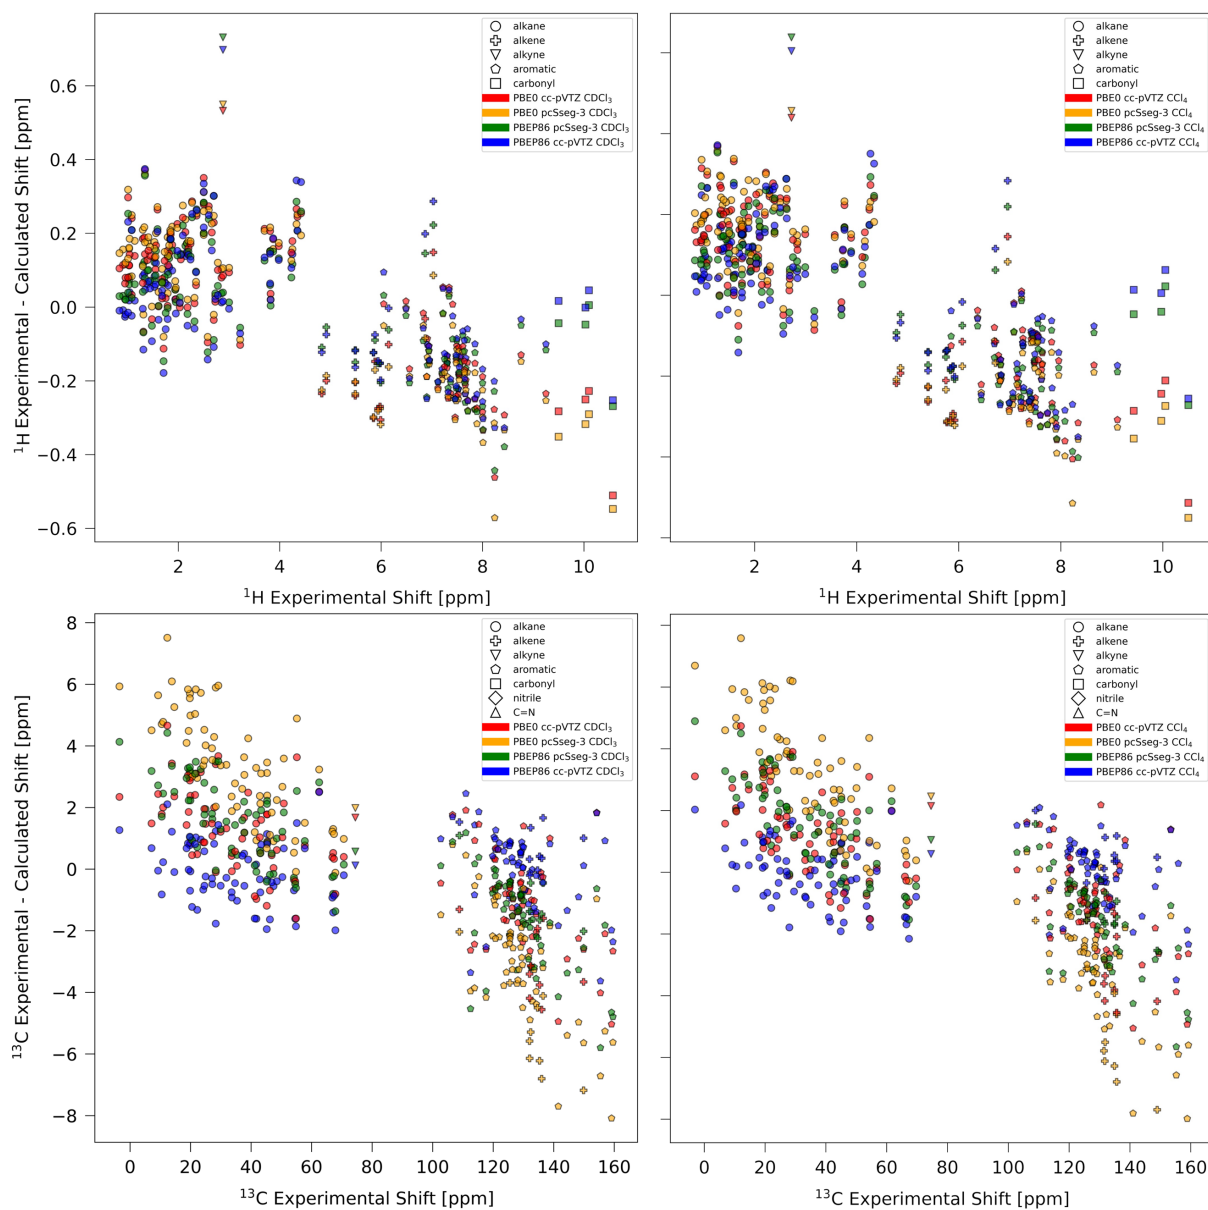

Figure S7: Residual plots between experimental and calculated chemical shifts in vacuum using Eq. (3) with  $m = -1$  for conversion. Top  $^1\text{H}$ . Bottom  $^{13}\text{C}$ .

**Residual plots of experimental shifts and calculated shifts in implicit solvent using Eq. (3) with  $m = -1$  for conversion**

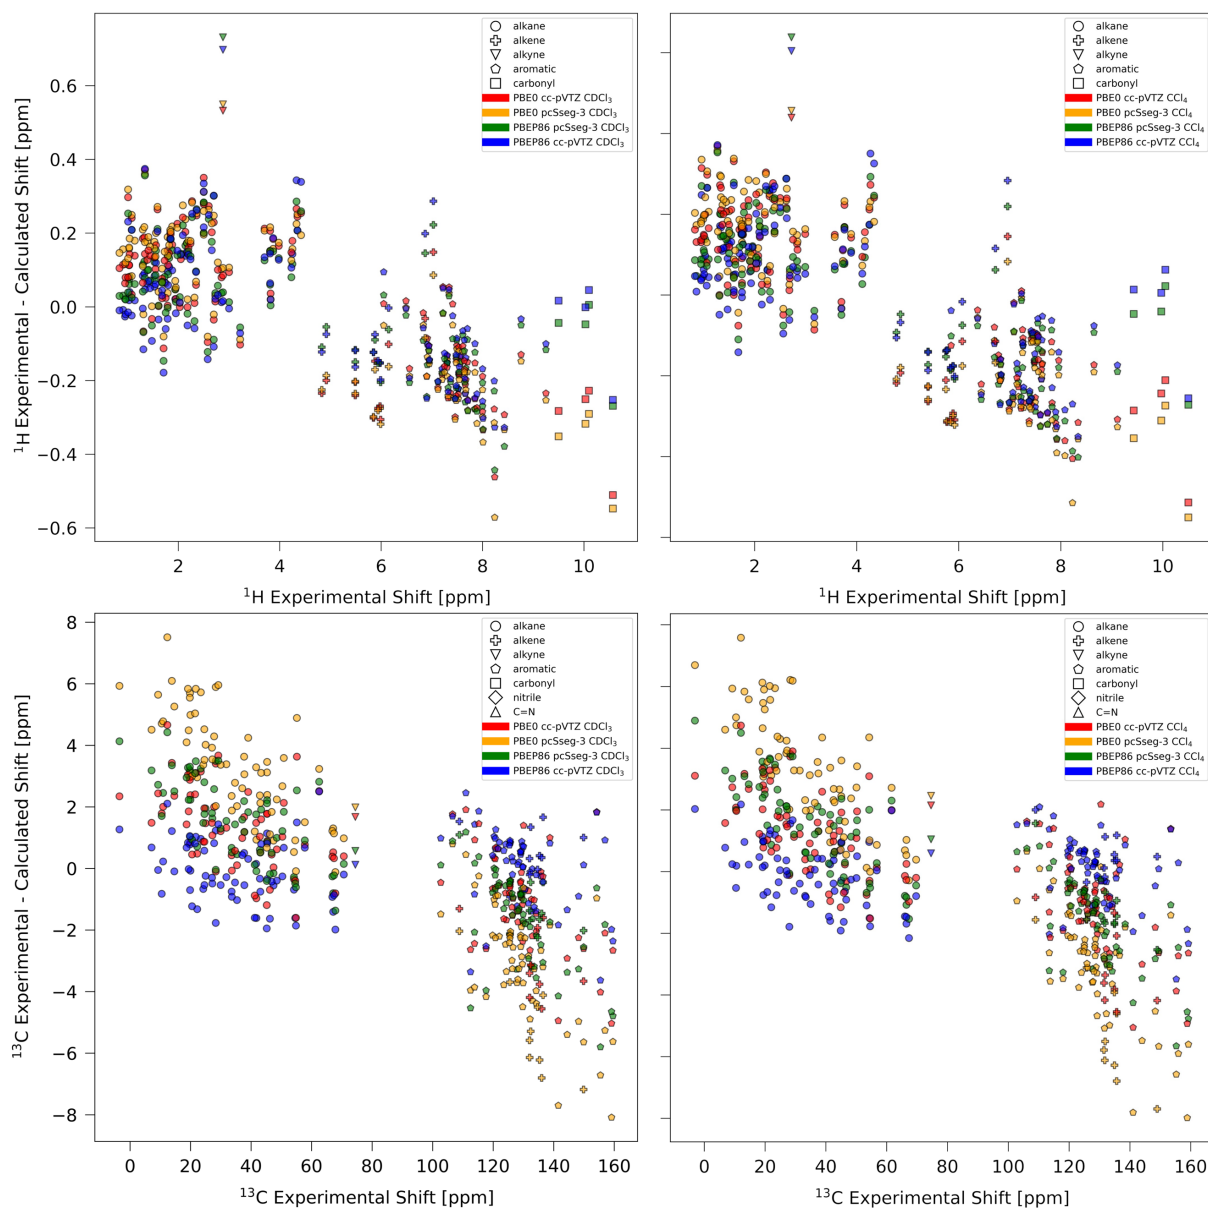

Figure S8: Residual plots between experimental and calculated chemical shifts in implicit solvent using Eq. (3) with  $m = -1$  for conversion. Top  $^1\text{H}$ . Bottom  $^{13}\text{C}$ .



## References

- 1 H. E. Gottlieb, V. Kotlyar and A. Nudelman, *Journal of Organic Chemistry*, 1997, **62**, 7512–7515.
- 2 H. Ito and T. Ito, *Chemistry Letters*, 1985, **14**, 1251–1254.
- 3 W. F. Bailey and E. A. Cioffi, *Magnetic Resonance in Chemistry*, 1987, **25**, 181–183.
- 4 M. D. Coburn, C. B. Storm, D. W. Moore and T. G. Archibald, *Magnetic Resonance in Chemistry*, 1990, **28**, 16–20.
- 5 R. Engelke, W. L. Earl and C. M. M. Rohlfiing, *The Journal of Chemical Physics*, 1985, **84**, 142–146.
- 6 E. Pretsch, P. Bühlmann and M. Badertscher, *Spektroskopische Daten zur Strukturaufklärung organischer Verbindungen*, Springer, Berlin, Heidelberg, 2010.
- 7 C. Altona, J. H. Ippel, A. J. A. W. Hoekzema, C. Erkelens, M. Groesbeek and L. A. Donders, *Magnetic Resonance in Chemistry*, 1989, **27**, 564–576.
- 8 W. J. Colucci, S. J. Jungk and R. D. Gandour, *Magnetic Resonance in Chemistry*, 1985, **23**, 335–343.
- 9 U. B. Patil, S. S. Shendage and J. M. Nagarkar, *Synthesis (Germany)*, 2013, **45**, 3295–3299.
- 10 R. G. Kalkhambkar, S. D. Bunge and K. K. Laali, *Tetrahedron Letters*, 2011, **52**, 5184–5187.
- 11 J. Nakazawa, M. Mizuki, Y. Shimazaki, F. Tani and Y. Naruta, *Organic Letters*, 2006, **8**, 4275–4278.
- 12 H. Schumann, M. Speis, W. P. Bosman, J. M. M. Smits and P. T. Beurskens, *Journal of Organometallic Chemistry*, 1991, **403**, 165–182.
- 13 A. Fukuoka, T. Nagano, S. Furuta, M. Yoshizawa, M. Hirano and S. Komiyama, *Bull Chem Soc Jpn*, 1998, **71**, 1409–1415.
- 14 R. A. Aitken, D. M. M. Farrell and E. H. M. Kirton, *Chemistry of Heterocyclic Compounds*, 2001, **37**, 1526–1531.
- 15 C. Bonfio, C. Caumes, C. D. Duffy, B. H. Patel, C. Percivalle, M. Tsanakopoulou and J. D. Sutherland, *J Am Chem Soc*, 2019, **141**, 3934–3939.
- 16 S. R. Sheng, L. L. Wu and X. Huang, *Journal of Chemical Research - Part S*, 2003, 258–259.
- 17 B. Capon and B. Guo, *J Am Chem Soc*, 1988, **110**, 5144–5147.
- 18 M. Niestroj and W. P. Neumann, *Chem Ber*, 1996, **129**, 45–51.
- 19 M. R. Rohman, M. Rajbangshi, B. M. Laloo, P. R. Sahu and B. Myrboh, *Tetrahedron Letters*, 2010, **51**, 2862–2864.
- 20 C. K. Lin and T. J. Lu, *Tetrahedron*, 2010, **66**, 9688–9693.
- 21 G. V. Markin, Y. A. Shevelev, G. A. Domrachev, G. K. Fukin, E. V. Baranov, M. A. Lopatin, V. A. Kuropatov, A. I. Kirillov, A. S. Shavyrin and Y. A. Kurskii, *Russian Chemical Bulletin*, 2008, **57**, 1970–1974.
- 22 J. A. Campbell, G. McDougald, H. McNab, L. V. C. Rees and R. G. Tyas, *Synthesis (Stuttg)*, 2007, **20**, 3179–3184.
- 23 Chemical Book, [https://www.chemicalbook.com/SpectrumEN\\_1120-64-5\\_13CNMR.htm](https://www.chemicalbook.com/SpectrumEN_1120-64-5_13CNMR.htm), (accessed May 24, 2021).
- 24 G. Bresciani, F. Marchetti and G. Pampaloni, *New Journal of Chemistry*, 2019, **43**, 10821–10825.
- 25 M. E. Jung and K. R. Buszek, *J Am Chem Soc*, 1988, **110**, 3965–3969.

- 26 J. E. Baldwin and K. A. Black, *J Am Chem Soc*, 1984, **106**, 1029–1040.
- 27 R. A. Aitken and N. Karodia, *Liebigs Annales*, 1997, 779–783.
- 28 N. C. Rol and A. D. H. Clague, *Organic Magnetic Resonance*, 1981, **16**, 187–194.
- 29 B. Xu, E. M. Hartigan, G. Feula, Z. Huang, J. P. Lumb and B. A. Arndtsen, *Angewandte Chemie - International Edition*, 2016, **55**, 15802–15806.
- 30 M. Mąkosza and M. Judka, *Chemistry - A European Journal*, 2002, **8**, 4234–4240.
- 31 J. C. Chalchat, R. Ph. Garry, B. Lacroix and A. Michet, *Magnetic Resonance in Chemistry*, 1985, **23**, 977–984.
- 32 A. Gonzalez-De-Castro, C. M. Robertson and J. Xiao, *J Am Chem Soc*, 2014, **136**, 8350–8360.
- 33 X. Xie and S. S. Stahl, *J Am Chem Soc*, 2015, **137**, 3767–3770.
- 34 T. Mori, C. Ishii and M. Kimura, *Organic Process Research and Development*, 2019, **23**, 1709–1717.
- 35 Y. Tang, R. I. L. Meador, C. T. Malinchak, E. E. Harrison, K. A. McCaskey, M. C. Hempel and T. W. Funk, *Journal of Organic Chemistry*, 2020, **85**, 1823–1834.
- 36 V. Bertolini, R. Appiani, M. Pallavicini and C. Bolchi, *Journal of Organic Chemistry*, 2021, **86**, 15712–15716.
- 37 G. Tang, Z. Gong, W. Han and X. Sun, *Tetrahedron Letters*, 2018, **59**, 658–662.
- 38 K. Paudel, B. Pandey, S. Xu, D. K. Taylor, D. L. Tyer, C. L. Torres, S. Gallagher, L. Kong and K. Ding, *Organic Letters*, 2018, **20**, 4478–4481.
- 39 Y. Zheng, J. Zhang, X. Cheng, X. Xu and L. Zhang, *Angewandte Chemie*, 2019, **131**, 5295–5299.
- 40 P. Thapa, S. Hazoor, B. Chouhan, T. T. Vuong and F. W. Foss, *Journal of Organic Chemistry*, 2020, **85**, 9096–9105.
- 41 S. A. Miller, J. M. Bobbitt and N. E. Leadbeater, *Organic and Biomolecular Chemistry*, 2017, **15**, 2817–2822.
- 42 M. Avi, M. H. Fechter, K. Gruber, F. Belaj, P. Pöchlauer and H. Griengl, *Tetrahedron*, 2004, **60**, 10411–10418.
- 43 E. C. Taylor and J. E. Macor, *Journal of Organic Chemistry*, 1989, **54**, 1249–1256.
- 44 D. R. Goud and U. Pathak, *Synthesis (Stuttg)*, 2012, **44**, 3678–3682.
- 45 B. Ilkgul, D. Gunes, O. Sirkecioglu and N. Bıcak, *Tetrahedron Letters*, 2010, **51**, 5313–5315.
- 46 T. M. Barclay, I. del Río, R. A. Gossage and S. M. Jackson, *Canadian Journal of Chemistry*, 2003, **81**, 1482–1491.
- 47 Chemical Book, <https://www.chemicalbook.com>, (accessed December 14, 2021).
- 48 R. A. Nyquist, R. Streck and G. Jeschek, *Journal of Molecular Structure*, 1996, **377**, 113–128.
- 49 R. J. Abraham, B. Bardsley, M. Mobli and R. J. Smith, *Magnetic Resonance in Chemistry*, 2005, **43**, 3–15.
- 50 N. J. R. van Eikema Hommes and T. Clark, *Journal of Molecular Modeling*, 2005, **11**, 175–185.
- 51 G. R. Fulmer, A. J. M. Miller, N. H. Sherden, H. E. Gottlieb, A. Nudelman, B. M. Stoltz, J. E. Bercaw and K. I. Goldberg, *Organometallics*, 2010, **29**, 2176–2179.
- 52 A. I. Popov, A. J. Smetana, J. -P Kintzinger and T. T.-T. Nguyêen, *Helvetica Chimica Acta*, 1980, **63**, 668–673.

- 53 R. I. Khusnutdinov, N. A. Shchadneva, A. R. Baiguzina, Y. Y. Lavrentieva and U. M. Dzhemilev, *Russian Chemical Bulletin*, 2002, **51**, 2074–2079.
- 54 S. Zahim, K. Delacroix, A. Carlier, T. Berranger, J. Bergraser, P. G. Echeverria and L. Petit, *Organic Process Research and Development*, 2022, **26**, 199–206.
- 55 A. B. Smith, R. A. Rivero, K. J. Hale and H. A. Vaccaro, *J Am Chem Soc*, 1991, **113**, 2092–2112.
- 56 L. Anzalone and J. A. Hirsch, *Journal of Organic Chemistry*, 1985, **50**, 2607–2613.
- 57 K. Ogura, M. Yamashita, M. Suzuki, S. Furukawa and G. I. Tsuchihashi, *Bull Chem Soc Jpn*, 1984, **57**, 1637–1642.
- 58 G. R. Newkome, V. K. Gupta, R. W. Griffin and S. Arai, *Journal of Organic Chemistry*, 1987, **52**, 5480–5482.
- 59 S. Seo, J. B. Taylor and M. F. Greaney, *Chemical Communications*, 2012, **48**, 8270–8272.
- 60 S. Agasti, S. Maiti, S. Maity, M. Anniyappan, M. B. Talawar and D. Maiti, *Polyhedron*, 2019, **172**, 120–124.
- 61 D. Tanini, C. Dalia and A. Capperucci, *Green Chemistry*, 2021, **23**, 5680–5686.
- 62 S. Manna, S. Maity, S. Rana, S. Agasti and D. Maiti, *Organic Letters*, 2012, **14**, 1736–1739.
- 63 M. A. Zolfigol, A. Khazaei, A. R. Moosavi-Zare, A. Zare, H. G. Kruger, Z. Asgari, V. Khakyzadeh and M. Kazem-Rostami, *Journal of Organic Chemistry*, 2012, **77**, 3640–3645.
- 64 C. B. McPake, C. B. Murray and G. Sandford, *ChemSusChem*, 2012, **5**, 312–319.
- 65 R. R. Yadav, R. A. Vishwakarma and S. B. Bharate, *Tetrahedron Letters*, 2012, **53**, 5958–5960.
- 66 G. Aridoss and K. K. Laali, *Journal of Organic Chemistry*, 2011, **76**, 8088–8094.
- 67 X. F. Wu, J. Schranck, H. Neumann and M. Beller, *Chemical Communications*, 2011, **47**, 12462–12463.
- 68 R. R. Biekofsky, A. B. Pomilio, R. A. Aristegui and R. H. Contreras, *Journal of Molecular Structure*, 1995, **344**, 143–150.
- 69 B. M. Zimmermann, T. T. Ngoc, D. I. Tzaras, T. Kaicharla and J. F. Teichert, *J Am Chem Soc*, 2021, **143**, 16865–16873.
- 70 J. Luo, B. Hu, A. Sam and T. L. Liu, *Organic Letters*, 2018, **20**, 361–364.
- 71 I. K. Sideri, E. Voutyritsa and C. G. Kokotos, *Synlett*, 2018, **29**, 1324–1328.
- 72 Y. Xiao, Y. Xu, H. S. Cheon and J. Chae, *Journal of Organic Chemistry*, 2013, **78**, 5804–5809.
- 73 H. Jiang, L. Lykke, S. U. Pedersen, W. J. Xiao and K. A. Jyørgensen, *Chemical Communications*, 2012, **48**, 7203–7205.
- 74 H. J. Xu, Y. F. Liang, Z. Y. Cai, H. X. Qi, C. Y. Yang and Y. S. Feng, *Journal of Organic Chemistry*, 2011, **76**, 2296–2300.
- 75 L. Jing, J. Wei, L. Zhou, Z. Huang, Z. Li and X. Zhou, *Chemical Communications*, 2010, **46**, 4767–4769.
- 76 T. Moriuchi, K. Kikushima, T. Kajikawa and T. Hirao, *Tetrahedron Letters*, 2009, **50**, 7385–7387.
- 77 G. Grossman, G. Komber, G. Kroshvitts, P. A. Kirpichnikov, N. A. Mukmeneva and D. G. Pobedimskii, *Bulletin of the Academy of Sciences of the USSR Division of Chemical Science*, 1989, **38**, 26–32.
- 78 K. Chen, C. Liu, L. Deng and G. Xu, *Steroids*, 2010, **75**, 513–516.

- 79 A. Bagno, S. Gerard, J. Kevelam, E. Menna and G. Scorrano, *Chemistry - A European Journal*, 2000, **6**, 2915–2924.
- 80 T. Shirai, K. Sugimoto, M. Iwasaki, R. Sumida, H. Fujita and Y. Yamamoto, *Synlett*, 2019, **30**, 972–976.
- 81 Z. Yan, X.-A. Yuan, Y. Zhao, C. Zhu and J. Xie, *Angewandte Chemie*, 2018, **130**, 13088–13092.
- 82 P. W. Jardon, E. H. Vickery, L. F. Pahler, N. Pourahmady, G. J. Mains and E. J. Eisenbraun, *Journal of Organic Chemistry*, 1984, **49**, 2130–2135.
- 83 I. I. Schuster, M. Parvez and A. J. Freyer, *Journal of Organic Chemistry*, 1988, **53**, 5819–5825.
- 84 N. R. Babij, E. O. McCusker, G. T. Whiteker, B. Canturk, N. Choy, L. C. Creemer, C. V. D. Amicis, N. M. Hewlett, P. L. Johnson, J. A. Knobelsdorf, F. Li, B. A. Lorsbach, B. M. Nugent, S. J. Ryan, M. R. Smith and Q. Yang, *Organic Process Research and Development*, 2016, **20**, 661–667.
- 85 Y. Sawama, Y. Yabe, M. Shigetsura, T. Yamada, S. Nagata, Y. Fujiwara, T. Maegawa, Y. Monguchi and H. Sajiki, *Advanced Synthesis and Catalysis*, 2012, **354**, 777–782.
- 86 M. Mansour, R. Giacomazzi, A. Ouali, M. Taillefer and A. Jutand, *Chemical Communications*, 2008, 6051–6053.
- 87 T. Shintou, W. Kikuchi and T. Mukaiyama, *Bull Chem Soc Jpn*, 2003, **76**, 1645–1667.
- 88 P. G. Dumanski, C. J. Easton, S. F. Lincoln and J. S. Simpson, *Australian Journal of Chemistry*, 2003, **56**, 1107–1111.
- 89 R. J. Abraham and M. Reid, *Journal of the Chemical Society. Perkin Transactions 2*, 2002, **2**, 1081–1091.
- 90 T. Guo, Y. Gao, Z. Li, J. Liu and K. Guo, *Synlett*, 2019, **30**, 329–332.
- 91 L. X. Chen, Y. H. Huang, H. Cong and Z. Tao, *Chemical Papers*, 2018, **72**, 661–667.
- 92 H. Zou, C. Hu, K. Chen, G. Xiao and X. Peng, *Synlett*, 2018, **29**, 2181–2184.
- 93 L. Zhang, Z. Zha, Z. Wang and S. Fu, *Tetrahedron Letters*, 2010, **51**, 1426–1429.
- 94 A. Wang and H. Jiang, *Journal of Organic Chemistry*, 2010, **75**, 2321–2326.
- 95 B. Yu, Y. Zhao, H. Zhang, J. Xu, L. Hao, X. Gao and Z. Liu, *Chemical Communications*, 2014, **50**, 2330–2333.
- 96 D. W. Tan, J.-B. Xie, Q. Li, H.-X. Li, J.-C. Li, H.-Y. Li and J.-P. Lang, *Dalton Transactions*, 2014, **43**, 14061–14071.
- 97 P. Wang, J. Cai, J. Yang, C. Sun, L. Li, H. Hu and M. Ji, *Tetrahedron Letters*, 2013, **54**, 533–535.
- 98 Y. Zhu, B. Zhao and Y. Shi, *Organic Letters*, 2013, **15**, 992–995.
- 99 Y. Wang, H. Zhao, Z. Hu, M. Kimura, Z. Zhiqiang, L. Peng and K. Hiratsuka, *Synthesis (Stuttg)*, 2011, **2**, 287–291.
- 100 L. Yu, H. Li, X. Zhang, J. Ye, J. Liu, Q. Xu and M. Lautens, *Organic Letters*, 2014, **16**, 1346–1349.
- 101 X. Zhang, J. Sun, Y. Ding and L. Yu, *Organic Letters*, 2015, **17**, 5840–5842.
- 102 Y. Suzuki, T. Yoshino, K. Moriyama and H. Togo, *Tetrahedron*, 2011, **67**, 3809–3814.
- 103 X. Tian, Y. L. Ren, F. Ren, X. Cheng, S. Zhao and J. Wang, *Synlett*, 2018, **29**, 2444–2448.
- 104 R. M. Denton, J. An, P. Lindovska and W. Lewis, *Tetrahedron*, 2012, **68**, 2899–2905.
- 105 B. V. Rokade, S. K. Malekar and K. R. Prabhu, *Chemical Communications*, 2012, **48**, 5506–5508.
- 106 S. Zheng, C. Yu and Z. Shen, *Organic Letters*, 2012, **14**, 3644–3647.

- 107 S. R. Mudshinge, C. S. Potnis, B. Xu and G. B. Hammond, *Green Chemistry*, 2020, **22**, 4161–4164.
- 108 W. Zhan, M. Tong, L. Ji, H. Zhang, Z. Ge, X. Wang and R. Li, *Chinese Chemical Letters*, 2019, **30**, 973–976.
- 109 Y. L. Ban, J. L. Dai, X. L. Jin, Q. B. Zhang and Q. Liu, *Chemical Communications*, 2019, **55**, 9701–9704.
- 110 T. P. Petersen, A. F. Larsen, A. Ritzén and T. Ulven, *Journal of Organic Chemistry*, 2013, **78**, 4190–4195.
- 111 Z. Guo, T. Pang, L. Yan, X. Wei, J. Chao and C. Xi, *Green Chemistry*, 2021, **23**, 7534–7538.
- 112 D. Wang, D. Kuang, F. Zhang, C. Yang and X. Zhu, *Advanced Synthesis and Catalysis*, 2015, **357**, 714–718.
- 113 C. Yang, F. Zhang, G. J. Deng and H. Gong, *Journal of Organic Chemistry*, 2019, **84**, 181–190.
- 114 V. Goyal, J. Gahtori, A. Narani, P. Gupta, A. Bordoloi and K. Natte, *Journal of Organic Chemistry*, 2019, **84**, 15389–15398.
- 115 S. Gupta, P. Sureshbabu, A. K. Singh, S. Sabiah and J. Kandasamy, *Tetrahedron Letters*, 2017, **58**, 909–913.
- 116 Y. A. Cheng, W. Z. Yu and Y. Y. Yeung, *Journal of Organic Chemistry*, 2016, **81**, 545–552.
- 117 G. Bian, H. Fan, S. Yang, H. Yue, H. Huang, H. Zong and L. Song, *Journal of Organic Chemistry*, 2013, **78**, 9137–9142.
- 118 A. Sakakura, M. Katsukawa and K. Ishihara, *Organic Letters*, 2005, **7**, 1999–2002.
- 119 J. Clark and G. Hitiris, *Spectrochimica Acta Part A: Molecular Spectroscopy*, 1984, **40**, 75–79.
- 120 V. L. Novikov, O. P. Shestak and V. A. Denisenko, *Russian Chemical Bulletin*, 2010, **59**, 1600–1604.
- 121 V. Gold and T. Mah, *Journal of the Chemical Society, Perkin Transactions 2*, 1981, 812–816.
- 122 A. Shahriza, R. Tabrizi and H. R. Ahsani, *Organic Preparations and Procedures International*, 2000, **32**, 47–55.
- 123 Y. Li, X. Liu, H. Jiang, B. Liu, Z. Chen and P. Zhou, *Angewandte Chemie - International Edition*, 2011, **50**, 6341–6345.
- 124 F. Xu, Y. L. Zhong, H. Li, J. Qi, R. Desmond, Z. J. Song, J. Park, T. Wang, M. Truppo, G. R. Humphrey and R. T. Ruck, *Organic Letters*, 2017, **19**, 5880–5883.
- 125 A. S. Shashkov, E. G. Cherepanova, L. I. Kas'yan, L. Y. Gnedenkov and M. F. Bombushkar', *Bulletin of the Academy of Sciences of the USSR Division of Chemical Science*, 1980, **29**, 382–387.
- 126 R. T. Boéré, J. A. Eng, K. Preuss, M. Parvez, C. D. Bryan and A. W. Cordes, *Canadian Journal of Chemistry*, 1994, **72**, 1171–1180.
- 127 R. J. Abraham and J. Fisher, *Magnetic Resonance in Chemistry*, 1985, **23**, 856–861.
- 128 D. A. Lanfranchi, M. Vellutini, M. C. Blanc, P. Bradesi, J. Casanova and F. Tomi, *Spectroscopy Letters*, 2010, **43**, 36–43.
- 129 University of Florida Research Foundation, USA PCT/US2012/068943, (WO2013/090260), 60.
- 130 R. Koçak, G. Borsato, O. de Lucchi and A. Daştan, *Helvetica Chimica Acta*, 2014, **97**, 537–545.
- 131 G. F. Gauze, E. A. Basso, M. G. Campos, R. Rittner and R. J. Abraham, *Journal of Physical Organic Chemistry*, 2006, **19**, 376–383.
- 132 M. Uyanik, R. Fukatsu and K. Ishihara, *Chemistry - An Asian Journal*, 2010, **5**, 456–460.

- 133 R. Labes, C. Battilocchio, C. Mateos, G. R. Cumming, O. de Frutos, J. A. Rincón, K. Binder and S. v. Ley, *Organic Process Research and Development*, 2017, **21**, 1419–1422.
- 134 M. C. Boucenna, J. S. Davidson, A. McKee, A. L. Porte and D. C. Apperley, *Journal of the Chemical Society, Perkin Transactions 2*, 1995, **2**, 1381–1387.
- 135 P. -A Carrupt and P. Vogel, *Helvetica Chimica Acta*, 1989, **72**, 1008–1028.
- 136 R. J. Abraham and N. J. Ainger, *Journal of the Chemical Society. Perkin Transactions 2*, 1999, 441–448.
- 137 R. J. Abraham, D. J. Chadwick, P. E. Smith and F. Sancassan, *Journal of the Chemical Society, Perkin Transactions 2*, 1989, 1377–1384.
- 138 H. Zhang, S. Fu, M. Tao, Z. Liao, C. Qian and X. Chen, *Research on Chemical Intermediates*, 2016, **42**, 3325–3332.
- 139 F. Ballaschk and S. F. Kirsch, *Green Chemistry*, 2019, **21**, 5896–5903.
- 140 J. L. Mieloszynski, M. Schneider, D. Paquet and C. G. Andrieu, *Recueil des Travaux Chimiques des Pays-Bas*, 1985, **104**, 9–15.
- 141 K. Walsh, H. F. Sneddon and C. J. Moody, *Organic Letters*, 2014, **16**, 5224–5227.
- 142 T. Mori, Y. Takeuchi and M. Hojo, *Tetrahedron Letters*, 2020, **61**, 151518.
- 143 D. Ye, Z. Liu, J. L. Sessler and C. Lei, *Chemical Communications*, 2020, **56**, 11811–11814.
- 144 S. Budweg, K. Junge and M. Beller, *Chemical Communications*, 2019, **55**, 14143–14146.
- 145 J. Lee, S. Wang, M. Callahan and P. Nagorny, *Organic Letters*, 2018, **20**, 2067–2070.
- 146 L. J. Mitchell and C. J. Moody, *Journal of Organic Chemistry*, 2014, **79**, 11091–11100.
- 147 S. Kawamorita, K. Yamazaki, H. Ohmiya, T. Iwai and M. Sawamura, *Advanced Synthesis and Catalysis*, 2012, **354**, 3440–3444.
- 148 C. Berini, O. H. Winkelmann, J. Otten, D. A. Vicić and O. Navarro, *Chemistry - A European Journal*, 2010, **16**, 6857–6860.
- 149 P. H. Helferty and P. Yates, *Organic Magnetic Resonance*, 1983, **21**, 352–356.
- 150 M. J. Aurell, P. Gaviña and R. Mestres, *Tetrahedron*, 1994, **50**, 2571–2582.
- 151 S. S. Shen, V. Kartika, Y. S. Tan, R. D. Webster and K. Narasaka, *Tetrahedron Letters*, 2012, **53**, 986–990.
- 152 H. M. Jhong, Y. H. Liu, S. M. Peng and S. T. Liu, *European Journal of Inorganic Chemistry*, 2016, 5449–5455.
- 153 C. Y. Chern, C. C. Tseng, R. H. Hsiao, F. F. Wong and Y. H. Kuo, *Heteroatom Chemistry*, 2019, **2019**, 5053702.
- 154 R. Hosseinzadeh, E. Narimani and M. Mavvaji, *Organic Preparations and Procedures International*, 2021, **53**, 461–471.
- 155 C. Cheng and M. Brookhart, *Angewandte Chemie - International Edition*, 2012, **51**, 9422–9424.
- 156 X. Qi, C. L. Li and X. F. Wu, *Chemistry - A European Journal*, 2016, **22**, 5835–5838.
- 157 G. Sun, X. Lv, Y. Zhang, M. Lei and L. Hu, *Organic Letters*, 2017, **19**, 4235–4238.
- 158 Z. Liu, P. Wang, Z. Yan, S. Chen, D. Yu, X. Zhao and T. Mu, *Beilstein Journal of Organic Chemistry*, 2020, **16**, 645–656.
- 159 T. Niu, S. Chen, M. Hong, T. Zhang, J. Chen, X. Dong and B. Ni, *Green Chemistry*, 2020, **22**, 5042–5049.

- 160 H. Zhang, T. Guo, M. Wu, X. Huo, S. Tang, X. Wang and J. Liu, *Tetrahedron Letters*, 2021, **67**, 152878.
- 161 S. Pradhan, V. Sharma and I. Chatterjee, *Organic Letters*, 2021, **23**, 6148–6152.
- 162 M. Hayashi, M. Shibuya and Y. Iwabuchi, *Journal of Organic Chemistry*, 2012, **77**, 3005–3009.
- 163 K. Ohsawa, M. Yoshida and T. Doi, *Journal of Organic Chemistry*, 2013, **78**, 3438–3444.
- 164 C. Zhu, Z. Zhang, W. Ding, J. Xie, Y. Chen, J. Wu, X. Chen and H. Ying, *Green Chemistry*, 2014, **16**, 1131–1138.
- 165 I. Ramos-Tomillero, M. Paradís-Bas, I. de Pinho Ribeiro Moreira, J. M. Bofill, E. Nicolás and F. Albericio, *Molecules*, 2015, **20**, 5409–5422.
- 166 R. Ray, S. Chandra, D. Maiti and G. K. Lahiri, *Chemistry - A European Journal*, 2016, **22**, 8814–8822.
- 167 S. S. Meng, L. R. Lin, X. Luo, H. J. Lv, J. L. Zhao and A. S. C. Chan, *Green Chemistry*, 2019, **21**, 6187–6193.
- 168 P. Xiao, Z. Tang, K. Wang, H. Chen, Q. Guo, Y. Chu, L. Gao and Z. Song, *Journal of Organic Chemistry*, 2018, **83**, 1687–1700.
- 169 T. Murata, M. Hiyoshi, M. Ratanasak, J. Y. Hasegawa and T. Ema, *Chemical Communications*, 2020, **56**, 5783–5786.
- 170 B. Hong, K. C. C. Aganda and A. Lee, *Organic Letters*, 2020, **22**, 4395–4399.
- 171 N. F. Nikitas, D. I. Tzaras, I. Triandafillidi and C. G. Kokotos, *Green Chemistry*, 2020, **22**, 471–477.
- 172 L. A. Trimble, P. B. Reese and J. C. Vederas, *J Am Chem Soc*, 1985, **107**, 2175–2177.
- 173 V. P. Kashparova, V. A. Klushin, I. Y. Zhukova, I. S. Kashparov, D. v. Chernysheva, I. B. Il'chibaeva, N. v. Smirnova, E. S. Kagan and V. M. Chernyshev, *Tetrahedron Letters*, 2017, **58**, 3517–3521.
- 174 S. Imai and H. Togo, *Tetrahedron*, 2016, **72**, 6948–6954.
- 175 M. Iinuma, K. Moriyama and H. Togo, *European Journal of Organic Chemistry*, 2014, 772–780.
- 176 P. Saisaha, L. Buettner, M. van der Meer, R. Hage, B. L. Feringa, W. R. Browne and J. W. de Boer, *Advanced Synthesis and Catalysis*, 2013, **355**, 2591–2603.
- 177 A. N. Mamros, P. R. Sharrow, W. E. Weller, M. R. Luderer, J. D. Fair, K. O. Pazehoski and M. R. Luderer, *Arkivoc*, 2011, **2011**, 23–33.
- 178 D. Tsuchiya, K. Moriyama and H. Togo, *Synlett*, 2011, **18**, 2701–2704.
- 179 N. Chang and C. Chiu, *Journal of the Chinese Chemical Society*, 1993, **40**, 379–384.
- 180 V. Kanchupalli, D. Joseph and S. Katukojvala, *Organic Letters*, 2015, **17**, 5878–5881.
- 181 K. Shibata, K. I. Takao and A. Ogura, *Journal of Organic Chemistry*, 2021, **86**, 10067–10087.
- 182 J. C. A. Flanagan, L. M. Dornan, M. G. McLaughlin, N. G. McCreanor, M. J. Cook and M. J. Muldoon, *Green Chemistry*, 2012, **14**, 1281–1283.
- 183 Y. Motoyama, K. Kamo and H. Nagashima, *Organic Letters*, 2009, **11**, 1345–1348.
- 184 F. Schoenebeck, J. A. Murphy, S. Z. Zhou, Y. Uenoyama, Y. Miclo and T. Tuttle, *J Am Chem Soc*, 2007, **129**, 13368–13369.
- 185 J. Siu, I. R. Baxendale and S. v. Ley, *Organic and Biomolecular Chemistry*, 2004, **2**, 160–167.
- 186 C. Koradin, W. Dohle, A. L. Rodriguez, B. Schmid and P. Knochel, *Tetrahedron*, 2003, **59**, 1571–1587.
- 187 M. Topolski, *Journal of Organic Chemistry*, 1995, **60**, 5588–5594.

- 188 Y. Akita, Y. Itagaki, S. Takizawa and A. Ohta, *Chemical and Pharmaceutical Bulletin*, 1989, **37**, 1477–1480.
- 189 E. M. M. van den Berg, F. J. H. M. Jansen, A. T. J. W. de Goede, A. U. Baldew and J. Lugtenburg, *Recueil des Travaux Chimiques des Pays-Bas*, 1990, **109**, 287–297.
- 190 X. Guo, Z. Peng, S. Jiang and J. Shen, *Synthetic Communications*, 2011, **41**, 2044–2052.
- 191 E. B. McLean, D. T. Mooney, D. J. Burns and A. L. Lee, *Organic Letters*, 2022, **24**, 686–691.
- 192 W. Qiu, S. Shi, R. Li, X. Lin, L. Rao and Z. Sun, *Chinese Journal of Chemistry*, 2021, **39**, 1255–1258.
- 193 T. Fukuyama, Y. Hamada and I. Ryu, *Synthesis (Germany)*, 2021, **53**, 3404–3408.
- 194 T. Fukuyama, Y. Fujita, H. Miyoshi, I. Ryu, S. C. Kao and Y. K. Wu, *Chemical Communications*, 2018, **54**, 5582–5585.
- 195 R. Pilli, V. Balakrishnan, R. Chandrasekaran and R. Rasappan, *Organic and Biomolecular Chemistry*, 2019, **17**, 1749–1753.
- 196 S. C. Richter and M. Oestreich, *Chemistry - A European Journal*, 2019, **25**, 8508–8512.
- 197 K. Zhang, L. Chang, Q. An, X. Wang and Z. Zuo, *J Am Chem Soc*, 2019, **141**, 10556–10564.
- 198 Y. Ding, S. Luo, L. Ma and J. An, *Journal of Organic Chemistry*, 2019, **84**, 17.
- 199 M. C. Haibach, B. M. Stoltz and R. H. Grubbs, *Angewandte Chemie*, 2017, **129**, 15319–15322.
- 200 A. Dewanji, C. Mück-Lichtenfeld and A. Studer, *Angewandte Chemie - International Edition*, 2016, **55**, 6749–6752.
- 201 N. Khan, A. C. Abhyankar, T. Nandi and N. Eswara Prasad, *Journal of Nanoscience and Nanotechnology*, 2019, **19**, 7982–7992.
- 202 R. J. Abraham, M. Canton and L. Griffiths, *Magnetic Resonance in Chemistry*, 2001, **39**, 421–431.
- 203 T. Laurens, D. Nicole, P. Rubini, J. C. Lauer, M. Matlengiewicz and N. Henzel, *Magnetic Resonance in Chemistry*, 1991, **29**, 1119–1129.
- 204 D. Schnurpfeil, *Journal für Praktische Chemie*, 1983, **325**, 481–488.
- 205 E. Fanghänel, Y. Keita, R. Radeaglia and W. Schmidt, *Journal für Praktische Chemie*, 1985, **327**, 837–846.
- 206 U. Niggli and M. Neuenschwander, *Helvetica Chimica Acta*, 1990, **73**, 2199–2208.
- 207 M. Leyendecker, N.-C. Meyer and C. M. Thiele, *Angewandte Chemie*, 2017, **129**, 11629–11632.
- 208 A. Gopi Krishna Reddy and G. Satyanarayana, *Journal of Organic Chemistry*, 2016, **81**, 12212–12222.
- 209 D. Heijnen, F. Tosi, C. Vila, M. C. A. Stuart, P. H. Elsinga, W. Szymanski and B. L. Feringa, *Angewandte Chemie - International Edition*, 2017, **56**, 3354–3359.
- 210 W. J. Shi and Z. J. Shi, *Chinese Journal of Chemistry*, 2018, **36**, 183–186.
- 211 A. Piontek, W. Ochędzan-Siodłak, E. Bisz and M. Szostak, *Advanced Synthesis and Catalysis*, 2019, **361**, 2329–2336.
- 212 K. Chen, W. Chen, X. Yi, W. Chen, M. Liu and H. Wu, *Chemical Communications*, 2019, **55**, 9287–9290.
- 213 A. Xia, X. Xie, X. Hu, W. Xu and Y. Liu, *Journal of Organic Chemistry*, 2019, **84**, 13841–13857.
- 214 V. Müller, D. Ghorai, L. Capdevila, A. M. Messinis, X. Ribas and L. Ackermann, *Organic Letters*, 2020, **22**, 7034–7040.
- 215 H. Fang and M. Oestreich, *Angewandte Chemie - International Edition*, 2020, **59**, 11394–11398.



- 216 V. G. Landge, R. Babu, V. Yadav, M. Subaramanian, V. Gupta and E. Balaraman, *Journal of Organic Chemistry*, 2020, **85**, 9876–9886.
- 217 G. Dilauro, A. Francesca Quivelli, P. Vitale, V. Capriati and F. M. Perna, *Angewandte Chemie*, 2019, **131**, 1813–1816.
- 218 J. C. Wan, J. M. Huang, Y. H. Jhan and J. C. Hsieh, *Organic Letters*, 2013, **15**, 2742–2745.
- 219 W. Guo, L.-Q. Lu, Y. Wang, Y.-N. Wang, J.-R. Chen and W.-J. Xiao, *Angewandte Chemie*, 2015, **127**, 2293–2297.
- 220 J. Tang, S. Zhao, Y. Wei, Z. Quan and C. Huo, *Organic and Biomolecular Chemistry*, 2017, **15**, 1589–1592.
- 221 A. Joshi, R. Kumar, R. Semwal, D. Rawat and S. Adimurthy, *Green Chemistry*, 2019, **21**, 962–967.
- 222 X. Zhu, C. Liu, Y. Liu, H. Yang and H. Fu, *Chemical Communications*, 2020, **56**, 12443–12446.
- 223 Y. F. Tan, Y. Chen, R. X. Li, Z. Guan and Y. H. He, *Tetrahedron Letters*, 2022, **89**, 153593.
- 224 S. S. R. Gupta and M. Lakshmi Kantam, *New Journal of Chemistry*, 2021, **45**, 16179–16186.
- 225 Y. Sakurai, K. Ikai, K. Hayakawa, Y. Ogiwara and N. Sakai, *Bull Chem Soc Jpn*, 2021, **94**, 1882–1893.
- 226 T. Li, G. B. Hammond and B. Xu, *Chemistry - A European Journal*, 2021, **27**, 9737–9741.
- 227 Y. Tian, X. Guo, M. Li, C. Li, X. Hu, L. Jin, N. Sun, B. Hu and Z. Shen, *Organic Letters*, 2021, **23**, 3928–3932.
- 228 L. Chen, S. Wang, P. Werz, Z. Han and D. P. Gates, *Heteroatom Chemistry*, 2018, **29**, e21474.
- 229 G. Cheng and M. Luo, *European Journal of Organic Chemistry*, 2011, 2519–2523.
- 230 C. Wang, J. Wan, Z. Zheng and Y. Pan, *Tetrahedron*, 2007, **63**, 5071–5075.
- 231 M. Westermayer, G. Häfelinger and C. Regelmann, *Tetrahedron*, 1984, **40**, 1845–1854.
- 232 S. B. Choe and K. J. Klabunde, *Journal of Organometallic Chemistry*, 1989, **359**, 409–418.
- 233 S. Saito, T. Ohwada and K. Shudo, *J Am Chem Soc*, 1995, **117**, 11081–11084.
- 234 Y. A. Ibrahim, N. A. Al-Awadi and K. Kaul, *Tetrahedron*, 2001, **57**, 7377–7381.
- 235 I. I. Schuster, *Journal of Organic Chemistry*, 1981, **46**, 5110–5118.
- 236 W. Kitching, H. A. Olszowy, I. Schott, W. Adcock and D. P. Cox, *Journal of Organometallic Chemistry*, 1986, **310**, 269–284.
- 237 R. J. Abraham, M. Canton, M. Reid and L. Griffiths, *Journal of the Chemical Society. Perkin Transactions 2*, 2000, 803–812.
